# Supplementary material for: First principles study of electronic and nonlinear optical properties of A–D–π–A and D–A–D–π–A configured compounds containing novel quinoline–carbazole derivatives
Source: Royal Society of Chemistry journal article supplement (doi:10.1039/d0ra02857f), 2020-01-01
Supplement: d0ra02857f1.pdf [file d0ra02857f1.pdf]

## First Principles Study for Electronic and Nonlinear Optical Properties of A-D- $\pi$ -A and D-A-D- $\pi$ -A Configured Compounds Containing Novel Quinoline-Carbazole Derivatives

Muhammad Khalid,<sup>a</sup> Akbar Ali,<sup>b</sup> Rifat Jawaria,<sup>a</sup> Muhammad Adnan Asghar,<sup>c</sup> Sumreen Asim,<sup>a</sup> Muhammad Usman Khan,<sup>d</sup> Riaz Hussain,<sup>d</sup> Muhammad Fayyaz ur Rehman<sup>b</sup>, Christopher J. Ennis<sup>e</sup>, Muhammad Safwan Akram<sup>\*e</sup>

\*corresponding authors: safwan.akram@tees.ac.uk

Table S1: Cartesian coordinates of Q1

|    | X-axis   | Y-axis   | Z-axis   |
|----|----------|----------|----------|
| C  | 5.686316 | 1.802841 | 0.24438  |
| C  | 5.086068 | 0.571849 | 0.128101 |
| C  | 3.67643  | 0.463652 | 0.066185 |
| C  | 2.878465 | 1.653978 | 0.126864 |
| C  | 3.535626 | 2.906343 | 0.245718 |
| C  | 4.905147 | 2.97913  | 0.303157 |
| H  | 6.766847 | 1.873079 | 0.291329 |
| H  | 5.684648 | -0.32852 | 0.081395 |
| C  | 2.945312 | -0.74645 | -0.06308 |
| H  | 2.91171  | 3.790324 | 0.291682 |
| H  | 5.393856 | 3.942455 | 0.395252 |
| C  | 0.881406 | 0.497629 | -0.02086 |
| C  | 1.579912 | -0.74354 | -0.11179 |
| H  | 1.040303 | -1.6693  | -0.24433 |
| C  | -0.60339 | 0.538837 | -0.06162 |
| C  | -1.24618 | 1.749891 | -0.40265 |
| C  | -1.37087 | -0.59203 | 0.240804 |
| C  | -2.62633 | 1.845377 | -0.45913 |
| H  | -0.62468 | 2.607973 | -0.61787 |
| C  | -2.75719 | -0.48711 | 0.186585 |
| H  | -0.90714 | -1.52432 | 0.539879 |
| C  | -3.40775 | 0.722541 | -0.16537 |
| H  | -3.09402 | 2.785465 | -0.72987 |
| Br | 3.859141 | -2.43033 | -0.19332 |
| N  | 1.522396 | 1.647606 | 0.082769 |
| N  | -3.72359 | -1.4459  | 0.445792 |
| C  | -4.98218 | -0.89634 | 0.266503 |
| C  | -6.23947 | -1.48333 | 0.408823 |
| C  | -7.35376 | -0.68967 | 0.162243 |
| C  | -7.22363 | 0.656333 | -0.21661 |
| C  | -5.96958 | 1.236327 | -0.35724 |
| C  | -4.82978 | 0.462027 | -0.11635 |
| H  | -6.34741 | -2.52181 | 0.701428 |
| H  | -8.34343 | -1.12008 | 0.265322 |
| H  | -8.11395 | 1.245974 | -0.40093 |
| H  | -5.87579 | 2.275966 | -0.65063 |
| H  | -3.54006 | -2.39729 | 0.715474 |

**Table S2: Cartesian coordinates of Q1D1**

|    | <b>X-axis</b> | <b>Y-axis</b> | <b>Z-axis</b> |
|----|---------------|---------------|---------------|
| C  | -7.44925      | -4.56081      | 0.576698      |
| C  | -6.10414      | -4.42188      | 0.330787      |
| C  | -5.52435      | -3.13589      | 0.217065      |
| C  | -6.35674      | -1.97679      | 0.360929      |
| C  | -7.74097      | -2.16155      | 0.614006      |
| C  | -8.27409      | -3.42203      | 0.719285      |
| H  | -7.88178      | -5.55089      | 0.662351      |
| H  | -5.47334      | -5.29423      | 0.220527      |
| C  | -4.15456      | -2.86732      | -0.0423       |
| H  | -8.34804      | -1.27115      | 0.720969      |
| H  | -9.33308      | -3.5488       | 0.91354       |
| C  | -4.60488      | -0.50189      | 0.042771      |
| C  | -3.69254      | -1.58439      | -0.13362      |
| H  | -2.65381      | -1.39703      | -0.36126      |
| C  | -4.1408       | 0.907388      | -0.04903      |
| C  | -5.08873      | 1.925576      | -0.29058      |
| C  | -2.79002      | 1.241191      | 0.109261      |
| C  | -4.71403      | 3.255279      | -0.38732      |
| H  | -6.12513      | 1.635978      | -0.39512      |
| C  | -2.42579      | 2.578351      | 0.010395      |
| H  | -2.04213      | 0.492285      | 0.334291      |
| C  | -3.3672       | 3.602431      | -0.23937      |
| H  | -5.46125      | 4.017764      | -0.57635      |
| Br | -2.90794      | -4.3055       | -0.29159      |
| N  | -5.88918      | -0.70627      | 0.271728      |
| N  | -1.15481      | 3.155598      | 0.147901      |
| C  | -1.27842      | 4.541718      | -0.02777      |
| C  | -0.28985      | 5.521808      | 0.002809      |
| C  | -0.68619      | 6.839203      | -0.204        |
| C  | -2.03003      | 7.170659      | -0.43512      |
| C  | -3.00906      | 6.185505      | -0.46754      |
| C  | -2.63831      | 4.852474      | -0.26489      |
| H  | 0.747833      | 5.266853      | 0.179427      |
| H  | 0.060705      | 7.624636      | -0.18655      |
| H  | -2.30392      | 8.207466      | -0.59104      |
| H  | -4.04555      | 6.446246      | -0.64961      |
| C  | 0.042714      | 2.467749      | 0.364689      |
| C  | 0.765083      | 2.383583      | 1.524031      |
| S  | 0.847533      | 1.618125      | -0.9468       |
| C  | 1.954697      | 1.627481      | 1.385876      |
| H  | 0.435874      | 2.843249      | 2.446199      |
| C  | 2.148457      | 1.125081      | 0.1174        |
| H  | 2.634776      | 1.429495      | 2.203604      |
| C  | 3.230022      | 0.294302      | -0.36631      |
| C  | 3.246943      | -0.50805      | -1.49578      |
| S  | 4.737575      | 0.210087      | 0.504217      |
| C  | 4.456887      | -1.19268      | -1.64959      |
| H  | 2.404135      | -0.61117      | -2.16617      |

|   |          |          |          |
|---|----------|----------|----------|
| C | 5.400077 | -0.93313 | -0.65739 |
| H | 4.661967 | -1.87602 | -2.46394 |
| C | 6.684208 | -1.56078 | -0.69844 |
| C | 7.843717 | -1.48966 | 0.023312 |
| H | 6.739165 | -2.25668 | -1.52896 |
| C | 8.01137  | -0.56632 | 1.163518 |
| C | 8.958679 | -2.40806 | -0.33928 |
| O | 9.286827 | -0.32408 | 1.507426 |
| O | 8.811132 | -2.94747 | -1.58539 |
| H | 9.548466 | -3.56605 | -1.68623 |
| O | 9.891745 | -2.70565 | 0.362458 |
| O | 7.087126 | -0.01848 | 1.732746 |
| H | 9.246877 | 0.29794  | 2.249004 |

**Table S3: Cartesian coordinates of Q1D2**

|    | <b>X-axis</b> | <b>Y-axis</b> | <b>Z-axis</b> |
|----|---------------|---------------|---------------|
| C  | 7.288123      | -3.96649      | 1.165175      |
| C  | 6.09137       | -3.93247      | 0.490227      |
| C  | 5.380492      | -2.71656      | 0.351243      |
| C  | 5.923231      | -1.51825      | 0.923124      |
| C  | 7.161933      | -1.59417      | 1.611528      |
| C  | 7.827787      | -2.78859      | 1.729876      |
| H  | 7.823097      | -4.90364      | 1.265912      |
| H  | 5.679996      | -4.83488      | 0.05714       |
| C  | 4.144335      | -2.55532      | -0.32784      |
| H  | 7.550228      | -0.67657      | 2.035767      |
| H  | 8.772688      | -2.83295      | 2.25935       |
| C  | 4.154226      | -0.20827      | 0.215757      |
| C  | 3.535839      | -1.33387      | -0.4045       |
| H  | 2.610227      | -1.2237       | -0.94943      |
| C  | 3.52271       | 1.136678      | 0.157212      |
| C  | 4.315615      | 2.27722       | 0.409047      |
| C  | 2.160866      | 1.289815      | -0.13121      |
| C  | 3.779854      | 3.553758      | 0.371896      |
| H  | 5.360884      | 2.124412      | 0.639036      |
| C  | 1.63541       | 2.575108      | -0.16843      |
| H  | 1.514968      | 0.437062      | -0.29321      |
| C  | 2.421879      | 3.721089      | 0.082151      |
| H  | 4.410349      | 4.413353      | 0.569156      |
| Br | 3.294993      | -4.05158      | -1.17827      |
| N  | 5.310717      | -0.31007      | 0.844497      |
| N  | 0.312784      | 2.980533      | -0.41891      |
| C  | 0.254702      | 4.380131      | -0.32239      |
| C  | -0.83325      | 5.230532      | -0.50316      |
| C  | -0.61145      | 6.596763      | -0.36117      |
| C  | 0.659824      | 7.102079      | -0.05115      |
| C  | 1.741327      | 6.246963      | 0.119906      |
| C  | 1.546145      | 4.869282      | -0.01561      |
| H  | -1.81492      | 4.84637       | -0.7501       |

|   |          |          |          |
|---|----------|----------|----------|
| H | -1.43963 | 7.282925 | -0.49579 |
| H | 0.797473 | 8.171877 | 0.052391 |
| H | 2.723192 | 6.642585 | 0.353682 |
| C | -0.75903 | 2.125432 | -0.67233 |
| C | -0.94385 | 1.309322 | -1.75746 |
| S | -2.04543 | 1.914948 | 0.506374 |
| C | -2.12155 | 0.529716 | -1.67236 |
| H | -0.26014 | 1.294369 | -2.59533 |
| C | -2.84902 | 0.747042 | -0.52199 |
| H | -2.44827 | -0.14224 | -2.45505 |
| C | -4.11233 | 0.165483 | -0.13234 |
| C | -5.01418 | 0.619011 | 0.819273 |
| S | -4.69265 | -1.29823 | -0.87067 |
| C | -6.1586  | -0.18056 | 0.945791 |
| H | -4.85274 | 1.521538 | 1.393461 |
| C | -6.1665  | -1.27596 | 0.09183  |
| H | -6.96241 | 0.038779 | 1.633007 |
| C | -7.11373 | -2.32166 | -0.11298 |
| H | -6.85205 | -3.05754 | -0.86691 |
| C | -8.31645 | -2.53787 | 0.507307 |
| C | -9.10963 | -3.66528 | 0.137872 |
| N | -9.74767 | -4.57995 | -0.16613 |
| C | -8.84411 | -1.68998 | 1.522747 |
| N | -9.25875 | -0.99121 | 2.345241 |

**Table S4: Cartesian coordinates of Q1D3**

|   | <b>X-axis</b> | <b>Y-axis</b> | <b>Z-axis</b> |
|---|---------------|---------------|---------------|
| C | 7.23744       | -4.40164      | 1.081842      |
| C | 6.063025      | -4.25817      | 0.382502      |
| C | 5.441632      | -2.99109      | 0.275376      |
| C | 6.051772      | -1.85612      | 0.905317      |
| C | 7.264635      | -2.0448       | 1.617743      |
| C | 7.843159      | -3.28651      | 1.704001      |
| H | 7.703494      | -5.37719      | 1.157364      |
| H | 5.600876      | -5.11246      | -0.0947       |
| C | 4.236717      | -2.7183       | -0.42412      |
| H | 7.704832      | -1.17322      | 2.086101      |
| H | 8.769323      | -3.41663      | 2.25215       |
| C | 4.396203      | -0.39932      | 0.210314      |
| C | 3.716813      | -1.455        | -0.46696      |
| H | 2.815823      | -1.25925      | -1.02882      |
| C | 3.861706      | 0.987954      | 0.189508      |
| C | 4.726738      | 2.059743      | 0.500338      |
| C | 2.521343      | 1.247915      | -0.12235      |
| C | 4.284543      | 3.37225       | 0.495746      |
| H | 5.752716      | 1.824841      | 0.747462      |
| C | 2.089169      | 2.567907      | -0.12103      |
| H | 1.820982      | 0.450607      | -0.3345       |
| C | 2.948967      | 3.646687      | 0.183883      |

|    |          |          |          |
|----|----------|----------|----------|
| H  | 4.970709 | 4.177143 | 0.733983 |
| Br | 3.307177 | -4.11934 | -1.34947 |
| N  | 5.526695 | -0.60589 | 0.86057  |
| N  | 0.80773  | 3.073649 | -0.39173 |
| C  | 0.845009 | 4.468892 | -0.25136 |
| C  | -0.18025 | 5.395498 | -0.42119 |
| C  | 0.129845 | 6.737945 | -0.22769 |
| C  | 1.425971 | 7.145012 | 0.122948 |
| C  | 2.443564 | 6.213333 | 0.28669  |
| C  | 2.159315 | 4.856986 | 0.100356 |
| H  | -1.18042 | 5.083587 | -0.69584 |
| H  | -0.64739 | 7.483173 | -0.3522  |
| H  | 1.633073 | 8.199053 | 0.265527 |
| H  | 3.443931 | 6.533537 | 0.555177 |
| C  | -0.32602 | 2.307711 | -0.67424 |
| C  | -0.69119 | 1.754407 | -1.87178 |
| S  | -1.48224 | 1.907387 | 0.588372 |
| C  | -1.89142 | 1.00684  | -1.79719 |
| H  | -0.10654 | 1.885743 | -2.7723  |
| C  | -2.45429 | 0.9875   | -0.53932 |
| H  | -2.32402 | 0.486815 | -2.64171 |
| C  | -3.67452 | 0.34191  | -0.10911 |
| C  | -4.06936 | 0.019645 | 1.179658 |
| S  | -4.89274 | -0.13691 | -1.24955 |
| C  | -5.32319 | -0.60464 | 1.254894 |
| H  | -3.44939 | 0.214048 | 2.044999 |
| C  | -5.93326 | -0.78653 | 0.022413 |
| H  | -5.77517 | -0.93418 | 2.174023 |
| C  | -7.15196 | -1.38521 | -0.43383 |
| H  | -7.20237 | -1.43094 | -1.51908 |
| C  | -8.27164 | -1.92    | 0.150085 |
| C  | -9.25139 | -2.4504  | -0.75129 |
| N  | -10.0122 | -2.86462 | -1.51565 |
| C  | -8.67616 | -2.04234 | 1.572153 |
| O  | -7.81361 | -1.48552 | 2.457583 |
| H  | -8.21422 | -1.62021 | 3.329817 |
| O  | -9.69647 | -2.57643 | 1.928009 |

**Table S5: Cartesian coordinates of Q2**

|   | <b>X-axis</b> | <b>Y-axis</b> | <b>Z-axis</b> |
|---|---------------|---------------|---------------|
| C | -2.24088      | 5.116576      | -0.46469      |
| C | -2.31622      | 3.755172      | -0.28486      |
| C | -1.13929      | 2.976369      | -0.14295      |
| C | 0.131565      | 3.629139      | -0.22131      |
| C | 0.173026      | 5.037085      | -0.39829      |
| C | -0.98579      | 5.764236      | -0.51348      |
| H | -3.14942      | 5.69751       | -0.57609      |
| C | -1.13025      | 1.557909      | 0.049098      |
| H | 1.149458      | 5.503307      | -0.44817      |

|   |          |          |          |
|---|----------|----------|----------|
| H | -0.94155 | 6.838689 | -0.65268 |
| C | 1.306209 | 1.650375 | -0.01266 |
| C | 0.089206 | 0.920778 | 0.102099 |
| H | 0.113007 | -0.14458 | 0.288156 |
| C | 2.625667 | 0.965312 | 0.049343 |
| C | 3.783856 | 1.727214 | 0.323499 |
| C | 2.742636 | -0.41219 | -0.16975 |
| C | 5.037221 | 1.142956 | 0.392734 |
| H | 3.661447 | 2.790595 | 0.475374 |
| C | 4.00575  | -0.99224 | -0.1018  |
| H | 1.878705 | -1.01907 | -0.41173 |
| C | 5.168979 | -0.23403 | 0.181446 |
| H | 5.907865 | 1.751855 | 0.610026 |
| N | 1.313966 | 2.964674 | -0.15079 |
| N | 4.378339 | -2.31523 | -0.28561 |
| C | 5.748136 | -2.43859 | -0.12322 |
| C | 6.557997 | -3.57077 | -0.2111  |
| C | 7.922664 | -3.40655 | -0.00184 |
| C | 8.471089 | -2.14691 | 0.288054 |
| C | 7.660389 | -1.02224 | 0.37515  |
| C | 6.283408 | -1.15663 | 0.169604 |
| H | 6.141183 | -4.5465  | -0.43496 |
| H | 8.575596 | -4.26978 | -0.06449 |
| H | 9.539347 | -2.05476 | 0.445463 |
| H | 8.090239 | -0.05244 | 0.599984 |
| H | 3.748913 | -3.0729  | -0.48817 |
| C | -2.38231 | 0.766362 | 0.20209  |
| C | -2.64102 | -0.28942 | -0.67573 |
| C | -3.28646 | 1.047299 | 1.249784 |
| C | -3.80257 | -1.03646 | -0.49188 |
| H | -1.95779 | -0.5014  | -1.49045 |
| C | -4.43609 | 0.292007 | 1.43435  |
| H | -3.06045 | 1.856234 | 1.93375  |
| C | -4.71361 | -0.7625  | 0.559813 |
| H | -5.10826 | 0.51945  | 2.254241 |
| C | -5.78857 | -1.72584 | 0.443058 |
| C | -5.48411 | -2.54104 | -0.67758 |
| C | -6.95934 | -1.97066 | 1.167618 |
| C | -6.32111 | -3.58142 | -1.07977 |
| C | -7.79646 | -3.00612 | 0.771493 |
| H | -7.21153 | -1.36016 | 2.027566 |
| C | -7.47822 | -3.80107 | -0.34107 |
| H | -6.08119 | -4.19924 | -1.93798 |
| H | -8.70659 | -3.20484 | 1.325125 |
| H | -8.14765 | -4.60283 | -0.63138 |
| N | -4.2851  | -2.10901 | -1.22234 |
| H | -3.84411 | -2.50125 | -2.03675 |
| H | -3.28062 | 3.264206 | -0.25932 |

---

**Table S6: Cartesian coordinates of Q2D1**

|   | <b>X-axis</b> | <b>Y-axis</b> | <b>Z-axis</b> |
|---|---------------|---------------|---------------|
| C | -5.83644      | 4.900384      | 1.619365      |
| C | -5.32175      | 3.748609      | 1.071886      |
| C | -3.97407      | 3.690605      | 0.630507      |
| C | -3.14693      | 4.84397       | 0.812193      |
| C | -3.71392      | 6.021997      | 1.366112      |
| C | -5.0295       | 6.052173      | 1.755823      |
| H | -6.86663      | 4.923393      | 1.956444      |
| C | -3.3613       | 2.537824      | 0.038392      |
| H | -3.06174      | 6.879275      | 1.479716      |
| H | -5.45003      | 6.955321      | 2.183892      |
| C | -1.25739      | 3.774875      | 0.023083      |
| C | -2.01135      | 2.596449      | -0.24003      |
| H | -1.53104      | 1.753602      | -0.72055      |
| C | 0.201142      | 3.847802      | -0.26296      |
| C | 0.77104       | 5.110574      | -0.53988      |
| C | 1.013615      | 2.707809      | -0.23454      |
| C | 2.123001      | 5.251537      | -0.79764      |
| H | 0.116812      | 5.971368      | -0.53924      |
| C | 2.379302      | 2.856939      | -0.47798      |
| H | 0.60189       | 1.733709      | 0.002764      |
| C | 2.94966       | 4.123868      | -0.7672       |
| H | 2.535658      | 6.230324      | -1.01648      |
| N | -1.82533      | 4.867627      | 0.503188      |
| N | 3.388446      | 1.905476      | -0.49211      |
| C | 4.595743      | 2.523452      | -0.76941      |
| C | 5.875908      | 1.974974      | -0.88279      |
| C | 6.926833      | 2.836933      | -1.17638      |
| C | 6.717106      | 4.213119      | -1.35989      |
| C | 5.442355      | 4.754521      | -1.25461      |
| C | 4.366448      | 3.912452      | -0.95544      |
| H | 6.04999       | 0.912515      | -0.76879      |
| H | 7.928951      | 2.43365       | -1.2704       |
| H | 7.559208      | 4.855347      | -1.59029      |
| H | 5.283629      | 5.817177      | -1.402        |
| H | 3.306887      | 0.940852      | -0.20272      |
| C | -4.13116      | 1.303094      | -0.27585      |
| C | -3.63943      | 0.066004      | 0.151277      |
| C | -5.33282      | 1.353689      | -1.0166       |
| C | -4.36531      | -1.0788       | -0.15438      |
| H | -2.7234       | 0.008867      | 0.724541      |
| C | -6.04931      | 0.203283      | -1.31808      |
| H | -5.68987      | 2.311312      | -1.37414      |
| C | -5.57406      | -1.03688      | -0.88169      |
| H | -6.96256      | 0.270771      | -1.89846      |
| C | -6.03193      | -2.40536      | -1.01974      |
| C | -5.0765       | -3.22776      | -0.37589      |
| C | -7.14706      | -2.99596      | -1.62023      |
| C | -5.20949      | -4.61295      | -0.32371      |

|   |          |          |          |
|---|----------|----------|----------|
| C | -7.28611 | -4.37814 | -1.57509 |
| H | -7.8933  | -2.38511 | -2.11562 |
| C | -6.32658 | -5.17515 | -0.93386 |
| H | -4.47433 | -5.22954 | 0.178476 |
| H | -8.14562 | -4.84791 | -2.03859 |
| H | -6.45758 | -6.25086 | -0.90876 |
| N | -4.07053 | -2.41523 | 0.166799 |
| H | -5.94553 | 2.868522 | 0.988651 |
| C | -2.82845 | -2.8244  | 0.658622 |
| C | -2.28675 | -2.53294 | 1.880902 |
| S | -1.64587 | -3.58681 | -0.39638 |
| C | -0.92054 | -2.90184 | 1.98607  |
| H | -2.85348 | -2.05317 | 2.66736  |
| C | -0.42465 | -3.49613 | 0.851807 |
| H | -0.32164 | -2.75397 | 2.874721 |
| C | 0.942518 | -3.90908 | 0.576401 |
| C | 1.423585 | -5.09501 | 0.057718 |
| S | 2.211396 | -2.74238 | 0.800829 |
| C | 2.817818 | -5.07988 | -0.10845 |
| H | 0.789716 | -5.94141 | -0.16958 |
| C | 3.427261 | -3.88092 | 0.250447 |
| H | 3.39143  | -5.92273 | -0.47289 |
| C | 4.842078 | -3.70366 | 0.156606 |
| C | 5.714817 | -2.68844 | 0.419323 |
| C | 5.292168 | -1.35927 | 0.90942  |
| C | 7.143452 | -3.00125 | 0.116364 |
| O | 6.201106 | -0.74073 | 1.676141 |
| H | 5.838648 | 0.130035 | 1.900833 |
| O | 4.207675 | -0.85625 | 0.671987 |
| O | 7.922204 | -1.9057  | -0.00465 |
| H | 8.807472 | -2.23038 | -0.22613 |
| O | 7.57262  | -4.11675 | -0.07136 |
| H | 5.342714 | -4.60253 | -0.19608 |

**Table S7: Cartesian coordinates of Q2D2**

|   | <b>X-axis</b> | <b>Y-axis</b> | <b>Z-axis</b> |
|---|---------------|---------------|---------------|
| C | 3.046281      | -4.10986      | 4.436723      |
| C | 2.609002      | -3.81827      | 3.165901      |
| C | 3.124055      | -2.70031      | 2.461122      |
| C | 4.085742      | -1.86175      | 3.10838       |
| C | 4.522248      | -2.1969       | 4.416888      |
| C | 4.017175      | -3.29707      | 5.06441       |
| H | 2.640057      | -4.96518      | 4.96461       |
| C | 2.726823      | -2.32872      | 1.137462      |
| H | 5.255382      | -1.5467       | 4.878296      |
| H | 4.354765      | -3.54094      | 6.065508      |
| C | 4.193706      | -0.39013      | 1.329174      |
| C | 3.259012      | -1.17882      | 0.599528      |
| H | 2.998495      | -0.90836      | -0.415        |



|   |          |          |          |
|---|----------|----------|----------|
| C | 4.782314 | 0.8469   | 0.748647 |
| C | 5.956561 | 1.382959 | 1.323988 |
| C | 4.194742 | 1.491912 | -0.34608 |
| C | 6.551573 | 2.528813 | 0.824248 |
| H | 6.378905 | 0.868245 | 2.175648 |
| C | 4.797164 | 2.644144 | -0.84226 |
| H | 3.278177 | 1.124449 | -0.79133 |
| C | 5.979511 | 3.180265 | -0.27382 |
| H | 7.455133 | 2.91446  | 1.28331  |
| N | 4.598773 | -0.74202 | 2.536813 |
| N | 4.411811 | 3.455766 | -1.89857 |
| C | 5.313366 | 4.498344 | -2.03635 |
| C | 5.331885 | 5.545849 | -2.95716 |
| C | 6.368178 | 6.468179 | -2.86523 |
| C | 7.36361  | 6.35359  | -1.88158 |
| C | 7.341435 | 5.308079 | -0.96733 |
| C | 6.311367 | 4.364447 | -1.03578 |
| H | 4.566302 | 5.640853 | -3.71924 |
| H | 6.406846 | 7.292736 | -3.56806 |
| H | 8.156775 | 7.090725 | -1.8385  |
| H | 8.113551 | 5.224897 | -0.21058 |
| H | 3.610837 | 3.302202 | -2.48681 |
| C | 1.780659 | -3.15154 | 0.333463 |
| C | 0.597242 | -2.57894 | -0.1429  |
| C | 2.088021 | -4.49224 | 0.019428 |
| C | -0.25136 | -3.36655 | -0.91388 |
| H | 0.342864 | -1.5553  | 0.103273 |
| C | 1.237446 | -5.26671 | -0.75724 |
| H | 3.018052 | -4.91468 | 0.379849 |
| C | 0.046205 | -4.71092 | -1.23106 |
| H | 1.499253 | -6.29212 | -0.99247 |
| C | -1.05452 | -5.21465 | -2.02738 |
| C | -1.98336 | -4.15712 | -2.16305 |
| C | -1.32827 | -6.44503 | -2.63157 |
| C | -3.16707 | -4.29846 | -2.88231 |
| C | -2.50906 | -6.59712 | -3.34843 |
| H | -0.62965 | -7.26933 | -2.5428  |
| C | -3.41609 | -5.5343  | -3.47124 |
| H | -3.86604 | -3.47735 | -2.98316 |
| H | -2.73363 | -7.5464  | -3.82025 |
| H | -4.32947 | -5.67573 | -4.03741 |
| N | -1.4868  | -3.0302  | -1.48844 |
| H | 1.856452 | -4.43884 | 2.696369 |
| C | -2.13919 | -1.8031  | -1.35108 |
| C | -1.86381 | -0.6283  | -1.99788 |
| S | -3.45978 | -1.60411 | -0.2083  |
| C | -2.6994  | 0.439683 | -1.5923  |
| H | -1.08199 | -0.54703 | -2.74084 |
| C | -3.62506 | 0.085314 | -0.63437 |
| H | -2.61785 | 1.444201 | -1.98614 |
| C | -4.63843 | 0.909586 | -0.01576 |

|   |          |          |          |
|---|----------|----------|----------|
| C | -5.33725 | 0.679168 | 1.159323 |
| S | -5.14113 | 2.409545 | -0.73816 |
| C | -6.25224 | 1.690634 | 1.485563 |
| H | -5.17017 | -0.19346 | 1.776577 |
| C | -6.27852 | 2.730621 | 0.565694 |
| H | -6.86776 | 1.66987  | 2.372799 |
| C | -7.03523 | 3.938651 | 0.508957 |
| H | -6.83366 | 4.585016 | -0.33954 |
| C | -7.98916 | 4.406592 | 1.373447 |
| C | -8.62594 | 5.657207 | 1.113247 |
| C | -8.40102 | 3.710963 | 2.546187 |
| N | -8.72428 | 3.133951 | 3.494365 |
| N | -9.13795 | 6.67053  | 0.896514 |

**Table S8: Cartesian coordinates of Q2D3**

|   | <b>X-axis</b> | <b>Y-axis</b> | <b>Z-axis</b> |
|---|---------------|---------------|---------------|
| C | -5.49292      | 5.032447      | 1.688688      |
| C | -4.99207      | 3.877524      | 1.135031      |
| C | -3.64521      | 3.805686      | 0.692622      |
| C | -2.80589      | 4.949264      | 0.876685      |
| C | -3.35877      | 6.131541      | 1.43562       |
| C | -4.67301      | 6.174624      | 1.828648      |
| H | -6.52222      | 5.06532       | 2.027702      |
| C | -3.04618      | 2.647588      | 0.095683      |
| H | -2.69644      | 6.980811      | 1.550537      |
| H | -5.08262      | 7.080524      | 2.261479      |
| C | -0.9289       | 3.860133      | 0.086997      |
| C | -1.69309      | 2.685837      | -0.17091      |
| H | -1.21697      | 1.839105      | -0.6498       |
| C | 0.526302      | 3.92529       | -0.21444      |
| C | 1.069421      | 5.159456      | -0.63455      |
| C | 1.359078      | 2.811168      | -0.05827      |
| C | 2.417765      | 5.294778      | -0.91513      |
| H | 0.399657      | 6.003485      | -0.72723      |
| C | 2.723777      | 2.959543      | -0.3124       |
| H | 0.96263       | 1.86487       | 0.292478      |
| C | 3.266956      | 4.195635      | -0.75456      |
| H | 2.811008      | 6.249372      | -1.24739      |
| N | -1.48545      | 4.960886      | 0.561493      |
| N | 3.754875      | 2.041807      | -0.19951      |
| C | 4.948873      | 2.648532      | -0.54792      |
| C | 6.241803      | 2.120228      | -0.57083      |
| C | 7.273752      | 2.959913      | -0.97201      |
| C | 7.034179      | 4.293743      | -1.34364      |
| C | 5.747901      | 4.815825      | -1.31614      |
| C | 4.688744      | 3.994806      | -0.91381      |
| H | 6.431442      | 1.093774      | -0.28188      |
| H | 8.28779       | 2.576077      | -0.99811      |
| H | 7.864079      | 4.918931      | -1.6525       |

|   |          |          |          |
|---|----------|----------|----------|
| H | 5.567307 | 5.846593 | -1.60119 |
| H | 3.695749 | 1.103971 | 0.173246 |
| C | -3.84815 | 1.442316 | -0.25342 |
| C | -3.41839 | 0.177128 | 0.158874 |
| C | -5.02974 | 1.559082 | -1.01846 |
| C | -4.18862 | -0.92927 | -0.18258 |
| H | -2.51644 | 0.071696 | 0.747549 |
| C | -5.78919 | 0.448188 | -1.35726 |
| H | -5.33728 | 2.538742 | -1.36175 |
| C | -5.37867 | -0.81855 | -0.93325 |
| H | -6.68627 | 0.565994 | -1.95456 |
| C | -5.90098 | -2.15944 | -1.10463 |
| C | -5.00307 | -3.0388  | -0.4553  |
| C | -7.0325  | -2.68185 | -1.73649 |
| C | -5.2106  | -4.41559 | -0.42456 |
| C | -7.24458 | -4.05533 | -1.71522 |
| H | -7.73545 | -2.02544 | -2.23679 |
| C | -6.34253 | -4.91009 | -1.06548 |
| H | -4.52217 | -5.07789 | 0.085369 |
| H | -8.11744 | -4.47269 | -2.20321 |
| H | -6.53068 | -5.97751 | -1.05733 |
| N | -3.96679 | -2.28666 | 0.119048 |
| H | -5.6263  | 3.005181 | 1.048423 |
| C | -2.76562 | -2.77528 | 0.632332 |
| C | -2.20139 | -2.48023 | 1.844425 |
| S | -1.65948 | -3.69651 | -0.37835 |
| C | -0.87818 | -2.97237 | 1.975915 |
| H | -2.72306 | -1.91794 | 2.606748 |
| C | -0.44015 | -3.66739 | 0.87498  |
| H | -0.27188 | -2.84151 | 2.862332 |
| C | 0.880278 | -4.22097 | 0.630207 |
| C | 1.257228 | -5.45873 | 0.143381 |
| S | 2.256687 | -3.19073 | 0.883363 |
| C | 2.64984  | -5.59186 | 0.012724 |
| H | 0.546262 | -6.24167 | -0.08276 |
| C | 3.361575 | -4.45076 | 0.363816 |
| H | 3.14216  | -6.49211 | -0.33263 |
| C | 4.776278 | -4.32091 | 0.27251  |
| C | 5.57564  | -3.22241 | 0.406689 |
| C | 5.064443 | -1.91668 | 0.634369 |
| C | 7.0426   | -3.40815 | 0.242675 |
| O | 7.71507  | -2.24537 | 0.362066 |
| H | 8.654402 | -2.44775 | 0.240521 |
| O | 7.577935 | -4.46786 | 0.026356 |
| H | 5.312748 | -5.23606 | 0.034489 |
| N | 4.614849 | -0.86261 | 0.790233 |

---

**Table S9: Natural bond orbital (NBO) analysis of compound Q1 by using CAM-B3LYP/6-311G (d, p).**

| Donor (i)                        | Type     | Acceptor(j)                      | Type       | E(2) <sup>a</sup> [kJ/mol] | E(j)-E(i) <sup>b</sup> [a.u.] | F(i,j) <sup>c</sup> [a.u.] |
|----------------------------------|----------|----------------------------------|------------|----------------------------|-------------------------------|----------------------------|
| C <sub>1</sub> -C <sub>2</sub>   | $\pi$    | C <sub>3</sub> -C <sub>4</sub>   | $\pi^*$    | 23.89                      | 0.36                          | 0.087                      |
| C <sub>1</sub> -C <sub>2</sub>   | $\pi$    | C <sub>5</sub> -C <sub>6</sub>   | $\pi^*$    | 24.78                      | 0.39                          | 0.088                      |
| C <sub>1</sub> -H <sub>7</sub>   | $\sigma$ | C <sub>2</sub> -C <sub>3</sub>   | $\sigma^*$ | 5.17                       | 1.19                          | 0.070                      |
| C <sub>2</sub> -C <sub>3</sub>   | $\sigma$ | C <sub>3</sub> -C <sub>9</sub>   | $\sigma^*$ | 5.63                       | 1.35                          | 0.078                      |
| C <sub>2</sub> -H <sub>8</sub>   | $\sigma$ | C <sub>3</sub> -C <sub>4</sub>   | $\sigma^*$ | 5.16                       | 1.16                          | 0.070                      |
| C <sub>3</sub> -C <sub>4</sub>   | $\sigma$ | C <sub>9</sub> -Br <sub>24</sub> | $\sigma^*$ | 6.93                       | 0.88                          | 0.070                      |
| C <sub>3</sub> -C <sub>4</sub>   | $\pi$    | C <sub>9</sub> -C <sub>13</sub>  | $\pi^*$    | 27.43                      | 0.34                          | 0.091                      |
| C <sub>5</sub> -C <sub>6</sub>   | $\pi$    | C <sub>3</sub> -C <sub>4</sub>   | $\pi^*$    | 25.53                      | 0.36                          | 0.090                      |
| C <sub>9</sub> -C <sub>13</sub>  | $\pi$    | C <sub>12</sub> -N <sub>25</sub> | $\pi^*$    | 28.99                      | 0.39                          | 0.097                      |
| C <sub>12</sub> -N <sub>25</sub> | $\pi$    | C <sub>3</sub> -C <sub>4</sub>   | $\pi^*$    | 28.63                      | 0.41                          | 0.103                      |
| C <sub>27</sub> -C <sub>32</sub> | $\pi$    | C <sub>30</sub> -C <sub>31</sub> | $\pi^*$    | 31.28                      | 0.36                          | 0.097                      |
| C <sub>28</sub> -C <sub>29</sub> | $\pi$    | C <sub>27</sub> -C <sub>32</sub> | $\pi^*$    | 29.57                      | 0.36                          | 0.097                      |
| C <sub>30</sub> -C <sub>31</sub> | $\pi$    | C <sub>28</sub> -C <sub>29</sub> | $\pi^*$    | 31.09                      | 0.37                          | 0.096                      |
| Br <sub>24</sub>                 | LP(3)    | C <sub>9</sub> -C <sub>13</sub>  | $\pi^*$    | 12.90                      | 0.42                          | 0.069                      |
| N <sub>25</sub>                  | LP(1)    | C <sub>3</sub> -C <sub>4</sub>   | $\sigma^*$ | 11.98                      | 0.98                          | 0.097                      |
| N <sub>25</sub>                  | LP(1)    | C <sub>12</sub> -C <sub>13</sub> | $\sigma^*$ | 12.09                      | 0.97                          | 0.098                      |
| N <sub>26</sub>                  | LP(1)    | C <sub>20</sub> -C <sub>22</sub> | $\pi^*$    | 46.50                      | 0.36                          | 0.120                      |
| N <sub>26</sub>                  | LP(1)    | C <sub>27</sub> -C <sub>32</sub> | $\pi^*$    | 46.95                      | 0.36                          | 0.121                      |
| C <sub>15</sub> -C <sub>17</sub> | $\pi$    | C <sub>16</sub> -C <sub>18</sub> | $\pi^*$    | 294.44                     | 0.01                          | 0.095                      |
| C <sub>20</sub> -C <sub>22</sub> | $\pi$    | C <sub>16</sub> -C <sub>18</sub> | $\pi^*$    | 209.96                     | 0.02                          | 0.094                      |
| C <sub>27</sub> -C <sub>32</sub> | $\pi$    | C <sub>28</sub> -C <sub>29</sub> | $\pi^*$    | 372.21                     | 0.01                          | 0.095                      |
| C <sub>27</sub> -C <sub>32</sub> | $\pi$    | C <sub>30</sub> -C <sub>31</sub> | $\pi^*$    | 265.38                     | 0.02                          | 0.095                      |

<sup>a</sup> E(2) means energy of hyper conjugative interaction (stabilization energy).

<sup>b</sup> Energy difference between donor and acceptor i and j NBO orbitals.

<sup>c</sup> F(i,j) is the Fock matrix element between i and j NBO orbitals.

**Table S10: Natural bond orbital (NBO) analysis of compound Q1D1 by using CAM-B3LYP/6-311G (d, p).**

| Donor(i) | Type     | Acceptor(j) | Type       | E(2)  | E(J)E(i) <sup>b</sup> (a.u) | F(I,j) <sup>c</sup> (a.u) |
|----------|----------|-------------|------------|-------|-----------------------------|---------------------------|
| N26-C27  | $\sigma$ | C37-C38     | $\sigma^*$ | 0.55  | 1.50                        | 0.026                     |
| C1-C2    | $\pi$    | C5-C6       | $\pi^*$    | 24.74 | 0.39                        | 0.088                     |
| C1-H7    | $\sigma$ | C2-C3       | $\sigma^*$ | 5.18  | 1.19                        | 0.070                     |
| C2-C3    | $\sigma$ | C3-C9       | $\sigma^*$ | 5.63  | 1.35                        | 0.078                     |
| C2-H8    | $\sigma$ | C3-C4       | $\sigma^*$ | 5.16  | 1.16                        | 0.070                     |
| C3-C4    | $\sigma$ | C3-C9       | $\sigma^*$ | 4.89  | 1.33                        | 0.072                     |
| C3-C4    | $\sigma$ | C9-Br24     | $\sigma^*$ | 6.90  | 0.88                        | 0.070                     |
| C3-C9    | $\sigma$ | C2-C3       | $\sigma^*$ | 5.69  | 1.40                        | 0.080                     |
| C5-C6    | $\pi$    | C1-C2       | $\pi^*$    | 24.52 | 0.39                        | 0.088                     |
| C5-H10   | $\sigma$ | C3-C4       | $\sigma^*$ | 5.02  | 1.16                        | 0.068                     |
| C6-H11   | $\sigma$ | C4-C5       | $\sigma^*$ | 4.93  | 1.18                        | 0.068                     |
| C9-C13   | $\pi$    | C12-N25     | $\pi^*$    | 29.16 | 0.39                        | 0.097                     |
| C12-C13  | $\sigma$ | C9-C13      | $\sigma^*$ | 5.09  | 1.41                        | 0.076                     |
| C12-C13  | $\sigma$ | C9-Br24     | $\sigma^*$ | 6.70  | 0.90                        | 0.069                     |
| C12-N25  | $\pi$    | C9-C13      | $\pi^*$    | 15.43 | 0.42                        | 0.073                     |
| C13-H14  | $\sigma$ | C3-C9       | $\sigma^*$ | 5.43  | 1.18                        | 0.072                     |
| C15-C16  | $\sigma$ | C15-C17     | $\sigma^*$ | 4.85  | 1.38                        | 0.073                     |
| C15-C16  | $\pi$    | C12-N25     | $\pi^*$    | 18.78 | 0.33                        | 0.072                     |
| C15-C16  | $\pi$    | C17-C20     | $\pi^*$    | 28.54 | 0.35                        | 0.089                     |
| C15-C16  | $\pi$    | C18-C22     | $\pi^*$    | 33.51 | 0.36                        | 0.098                     |
| C15-C17  | $\sigma$ | C20-N26     | $\sigma^*$ | 6.36  | 1.25                        | 0.080                     |
| C16-C18  | $\sigma$ | C22-C32     | $\sigma^*$ | 5.23  | 1.35                        | 0.075                     |
| C16-H19  | $\sigma$ | C15-C17     | $\sigma^*$ | 5.17  | 1.21                        | 0.070                     |
| C17-C20  | $\sigma$ | C20-C22     | $\sigma^*$ | 6.07  | 1.39                        | 0.082                     |
| C17-C20  | $\pi$    | C15-C16     | $\pi^*$    | 31.61 | 0.37                        | 0.098                     |
| C17-C20  | $\pi$    | C18-C22     | $\pi^*$    | 25.31 | 0.37                        | 0.088                     |
| C17-H21  | $\sigma$ | C20-C22     | $\sigma^*$ | 5.04  | 1.20                        | 0.069                     |
| C18-C22  | $\sigma$ | C20-C22     | $\sigma^*$ | 5.14  | 1.37                        | 0.075                     |
| C18-C22  | $\sigma$ | C22-C32     | $\sigma^*$ | 5.90  | 1.35                        | 0.080                     |
| C18-C22  | $\pi$    | C15-C16     | $\pi^*$    | 31.34 | 0.35                        | 0.095                     |
| C18-C22  | $\pi$    | C17-C20     | $\pi^*$    | 30.82 | 0.35                        | 0.093                     |
| C18-C22  | $\pi$    | C31-C32     | $\pi^*$    | 19.77 | 0.36                        | 0.076                     |
| C20-C22  | $\sigma$ | C17-C20     | $\sigma^*$ | 5.57  | 1.38                        | 0.079                     |
| C20-C22  | $\sigma$ | N26-C37     | $\sigma^*$ | 5.46  | 1.22                        | 0.073                     |
| C20-C22  | $\sigma$ | C31-C32     | $\sigma^*$ | 5.30  | 1.38                        | 0.077                     |
| C22-C32  | $\sigma$ | C18-C22     | $\sigma^*$ | 5.24  | 1.36                        | 0.076                     |
| C22-C32  | $\sigma$ | C31-C32     | $\sigma^*$ | 5.26  | 1.36                        | 0.076                     |
| N26-C27  | $\sigma$ | C37-C38     | $\pi^*$    | 1.69  | 0.90                        | 0.037                     |
| C27-C28  | $\sigma$ | C27-C32     | $\sigma^*$ | 5.87  | 1.39                        | 0.081                     |
| C27-C28  | $\pi$    | C29-C30     | $\pi^*$    | 34.05 | 0.37                        | 0.100                     |
| C27-C28  | $\pi$    | C31-C32     | $\pi^*$    | 25.39 | 0.37                        | 0.088                     |
| C28-C29  | $\sigma$ | N26-C27     | $\sigma^*$ | 6.94  | 1.25                        | 0.084                     |
| C29-C30  | $\pi$    | C27-C28     | $\pi^*$    | 27.74 | 0.35                        | 0.089                     |

|         |       |         |              |       |      |       |
|---------|-------|---------|--------------|-------|------|-------|
| C29-C30 | $\pi$ | C31-C32 | $\pi^*$      | 33.81 | 0.36 | 0.100 |
| C31-C32 | $\pi$ | C18-C22 | $\pi^*$      | 20.54 | 0.36 | 0.077 |
| C31-C32 | $\pi$ | C27-C28 | $\pi^*$      | 31.12 | 0.35 | 0.094 |
| C31-C32 | $\pi$ | C29-C30 | $\pi^*$      | 29.19 | 0.35 | 0.091 |
| C40-C42 | $\pi$ | C44-S46 | $\partial^*$ | 0.61  | 0.61 | 0.018 |
| C51-C52 | $\pi$ | C54-O56 | $\partial^*$ | 0.69  | 0.76 | 0.021 |
| C3      | LP(1) | C1-C2   | $\pi^*$      | 61.13 | 0.20 | 0.125 |
| C3      | LP(1) | C9-C13  | $\pi^*$      | 72.78 | 0.18 | 0.126 |
| N26     | LP(1) | C17-C20 | $\pi^*$      | 44.30 | 0.38 | 0.117 |
| N26     | LP(1) | C27-C28 | $\pi^*$      | 44.21 | 0.38 | 0.118 |
| S39     | LP(2) | C37-C38 | $\pi^*$      | 30.66 | 0.35 | 0.093 |
| S39     | LP(2) | C40-C42 | $\pi^*$      | 31.44 | 0.35 | 0.094 |
| S46     | LP(2) | C44-C45 | $\pi^*$      | 36.23 | 0.34 | 0.099 |
| S46     | LP(2) | C47-C49 | $\pi^*$      | 30.57 | 0.33 | 0.090 |
| O56     | LP(2) | C54-O60 | $\pi^*$      | 60.13 | 0.44 | 0.148 |
| O57     | LP(2) | C55-O59 | $\pi^*$      | 51.83 | 0.45 | 0.139 |
| O59     | LP(2) | C55-O57 | $\partial^*$ | 38.99 | 0.72 | 0.152 |
| O60     | LP(2) | C54-O56 | $\partial^*$ | 35.37 | 0.76 | 0.149 |

<sup>a</sup> E(2) means energy of hyper conjugative interaction (stabilization energy).

<sup>b</sup> Energy difference between donor and acceptor i and j NBO orbitals.

<sup>c</sup> F(i,j) is the Fock matrix element between i and j NBO orbitals.

**Table S11: Natural bond orbital (NBO) analysis of compound Q1D2 by using CAM-B3LYP/6-311G (d, p).**

| Donor(i) | Type       | Acceptor(j) | Type         | E(2)  | E(J)E(i) <sup>b</sup> (a.u) | F(I,j) <sup>c</sup> (a.u) |
|----------|------------|-------------|--------------|-------|-----------------------------|---------------------------|
| C1-C2    | $\pi$      | C3-C4       | $\pi^*$      | 23.95 | 0.36                        | 0.087                     |
| C1-C2    | $\pi$      | C5-C6       | $\pi^*$      | 24.72 | 0.39                        | 0.088                     |
| C1-H7    | $\partial$ | C2-C3       | $\partial^*$ | 5.18  | 1.19                        | 0.070                     |
| C2-C3    | $\partial$ | C3-C4       | $\partial^*$ | 4.65  | 1.34                        | 0.071                     |
| C2-C3    | $\partial$ | C3-C9       | $\partial^*$ | 5.63  | 1.35                        | 0.078                     |
| C2-C8    | $\partial$ | C3-C4       | $\partial^*$ | 5.15  | 1.16                        | 0.070                     |
| C3-C4    | $\partial$ | C3-C9       | $\partial^*$ | 4.89  | 1.33                        | 0.072                     |
| C3-C4    | $\partial$ | C9-Br24     | $\partial^*$ | 6.90  | 0.88                        | 0.070                     |
| C3-C4    | $\pi$      | C1-C2       | $\pi^*$      | 22.67 | 0.37                        | 0.086                     |
| C3-C4    | $\pi$      | C5-C6       | $\pi^*$      | 19.39 | 0.37                        | 0.080                     |
| C3-C4    | $\pi$      | C9-C13      | $\pi^*$      | 27.48 | 0.34                        | 0.091                     |
| C3-C4    | $\pi$      | C12-N25     | $\pi^*$      | 20.12 | 0.34                        | 0.076                     |
| C3-C9    | $\partial$ | C2-C3       | $\partial^*$ | 5.69  | 1.40                        | 0.080                     |
| C5-C6    | $\pi$      | C1-C2       | $\pi^*$      | 24.52 | 0.39                        | 0.088                     |
| C5-C6    | $\pi$      | C3-C4       | $\pi^*$      | 25.57 | 0.36                        | 0.090                     |
| C5-H10   | $\partial$ | C3-C4       | $\partial^*$ | 5.02  | 1.16                        | 0.068                     |
| C6-H11   | $\partial$ | C4-C5       | $\partial^*$ | 4.93  | 1.18                        | 0.068                     |
| C9-C13   | $\pi$      | C3-C4       | $\pi^*$      | 18.07 | 0.39                        | 0.079                     |
| C9-C13   | $\partial$ | C12-N25     | $\partial^*$ | 29.21 | 0.39                        | 0.098                     |
| C12-C13  | $\partial$ | C9-C13      | $\partial^*$ | 5.09  | 1.41                        | 0.076                     |
| C12-C13  | $\partial$ | C9-Br24     | $\partial^*$ | 6.68  | 0.90                        | 0.069                     |
| C12-N25  | $\pi$      | C3-C4       | $\pi^*$      | 28.44 | 0.41                        | 0.103                     |

|         |            |         |              |       |      |       |
|---------|------------|---------|--------------|-------|------|-------|
| C12-N25 | $\pi$      | C9-C13  | $\pi^*$      | 15.44 | 0.42 | 0.073 |
| C13-H14 | $\partial$ | C3-C9   | $\partial^*$ | 5.43  | 1.18 | 0.072 |
| C15-C16 | $\partial$ | C15-C17 | $\partial^*$ | 4.84  | 1.38 | 0.073 |
| C15-C17 | $\partial$ | C15-C16 | $\partial^*$ | 4.74  | 1.38 | 0.072 |
| C15-C17 | $\partial$ | C17-C20 | $\partial^*$ | 5.03  | 1.41 | 0.075 |
| C15-C17 | $\partial$ | C20-N26 | $\partial^*$ | 6.43  | 1.24 | 0.080 |
| C15-C17 | $\pi$      | C12-N25 | $\pi^*$      | 19.64 | 0.35 | 0.074 |
| C15-C17 | $\pi$      | C16-C18 | $\pi^*$      | 24.20 | 0.38 | 0.086 |
| C15-C17 | $\pi$      | C20-C22 | $\pi^*$      | 29.79 | 0.36 | 0.096 |
| C16-C18 | $\partial$ | C22-C32 | $\partial^*$ | 5.22  | 1.35 | 0.075 |
| C16-C18 | $\pi$      | C15-C17 | $\pi^*$      | 29.94 | 0.36 | 0.095 |
| C16-C18 | $\pi$      | C20-C22 | $\pi^*$      | 26.11 | 0.36 | 0.090 |
| C16-H19 | $\partial$ | C15-C17 | $\partial^*$ | 5.17  | 1.21 | 0.070 |
| C17-C20 | $\partial$ | C15-C17 | $\partial^*$ | 4.81  | 1.42 | 0.074 |
| C17-C20 | $\partial$ | C20-C22 | $\partial^*$ | 6.13  | 1.39 | 0.082 |
| C17-H21 | $\partial$ | C20-C22 | $\partial^*$ | 5.05  | 1.20 | 0.069 |
| C18-C22 | $\partial$ | C20-C22 | $\partial^*$ | 5.19  | 1.37 | 0.075 |
| C18-C22 | $\partial$ | C22-C32 | $\partial^*$ | 5.90  | 1.35 | 0.080 |
| C18-H23 | $\partial$ | C20-C22 | $\partial^*$ | 5.04  | 1.19 | 0.069 |
| C20-C22 | $\pi$      | C15-C17 | $\pi^*$      | 29.41 | 0.36 | 0.092 |
| C20-C22 | $\pi$      | C16-C18 | $\pi^*$      | 28.01 | 0.37 | 0.094 |
| C20-C22 | $\pi$      | C27-C32 | $\pi^*$      | 22.06 | 0.35 | 0.080 |
| C20-N26 | $\partial$ | C37-C38 | $\pi^*$      | 1.67  | 0.90 | 0.037 |
| N26-C27 | $\partial$ | C37-C38 | $\pi^*$      | 1.17  | 0.90 | 0.031 |
| C27-C32 | $\pi$      | C30-C31 | $\pi^*$      | 30.02 | 0.37 | 0.096 |
| C28-C29 | $\partial$ | N26-C27 | $\partial^*$ | 6.97  | 1.25 | 0.084 |
| C30-C31 | $\pi$      | C28-C29 | $\pi^*$      | 31.40 | 0.37 | 0.096 |
| C47-C49 | $\pi$      | C51-C53 | $\pi^*$      | 34.36 | 0.38 | 0.102 |
| C51-C53 | $\partial$ | C54-N55 | $\pi^*$      | 1.27  | 0.98 | 0.032 |
| C51-C53 | $\partial$ | C56-N57 | $\pi^*$      | 1.39  | 0.98 | 0.033 |
| C53-C54 | $\partial$ | C56-N57 | $\pi^*$      | 3.00  | 0.96 | 0.048 |
| C53-C56 | $\partial$ | C54-N55 | $\pi^*$      | 2.74  | 0.97 | 0.046 |
| N26     | LP(1)      | C20-C22 | $\pi^*$      | 39.51 | 0.37 | 0.112 |
| N26     | LP(1)      | C27-C32 | $\pi^*$      | 40.09 | 0.37 | 0.113 |
| S39     | LP(2)      | C37-C38 | $\pi^*$      | 31.11 | 0.35 | 0.094 |
| S39     | LP(2)      | C40-C42 | $\pi^*$      | 31.07 | 0.35 | 0.093 |
| S46     | LP(2)      | C44-C45 | $\pi^*$      | 35.49 | 0.34 | 0.099 |
| S46     | LP(2)      | C47-C49 | $\pi^*$      | 28.96 | 0.34 | 0.088 |

<sup>a</sup> E(2) means energy of hyper conjugative interaction (stabilization energy).

<sup>b</sup> Energy difference between donor and acceptor i and j NBO orbitals.

<sup>c</sup> F(i,j) is the Fock matrix element between i and j NBO orbita

**Table S12: Natural bond orbital (NBO) analysis of compound Q1D3 by using CAM-B3LYP/6-311G (d, p).**

| Donor(i) | Type       | Acceptor(j) | Type         | E(2)  | E(J)E(i) <sup>b</sup> (a.u) | F(I,j) <sup>c</sup> (a.u) |
|----------|------------|-------------|--------------|-------|-----------------------------|---------------------------|
| C1-H7    | $\partial$ | C1-C6       | $\partial^*$ | 0.61  | 1.20                        | 0.024                     |
| C1-C2    | $\pi$      | C5-C6       | $\pi^*$      | 24.73 | 0.39                        | 0.088                     |
| C1-H7    | $\partial$ | C2-C3       | $\partial^*$ | 5.18  | 1.19                        | 0.070                     |

|         |            |         |              |       |      |       |
|---------|------------|---------|--------------|-------|------|-------|
| C2-C3   | $\partial$ | C3-C4   | $\partial^*$ | 4.65  | 1.34 | 0.071 |
| C2-C3   | $\partial$ | C3-C9   | $\partial^*$ | 5.63  | 1.35 | 0.078 |
| C2-H8   | $\partial$ | C3-C4   | $\partial^*$ | 5.15  | 1.16 | 0.070 |
| C3-C4   | $\partial$ | C3-C9   | $\partial^*$ | 4.89  | 1.33 | 0.072 |
| C3-C4   | $\partial$ | C9-Br24 | $\partial^*$ | 6.90  | 0.88 | 0.070 |
| C3-C9   | $\partial$ | C2-C3   | $\partial^*$ | 5.69  | 1.40 | 0.080 |
| C5-C6   | $\pi$      | C1-C2   | $\pi^*$      | 24.51 | 0.39 | 0.088 |
| C5-H10  | $\partial$ | C3-C4   | $\partial^*$ | 5.02  | 1.16 | 0.068 |
| C6-H11  | $\partial$ | C4-C5   | $\partial^*$ | 4.93  | 1.18 | 0.068 |
| C9-C13  | $\pi$      | C12-N25 | $\pi^*$      | 29.18 | 0.39 | 0.098 |
| C12-C13 | $\partial$ | C9-C13  | $\partial^*$ | 5.09  | 1.41 | 0.076 |
| C12-C13 | $\partial$ | C9-Br24 | $\partial^*$ | 6.69  | 0.90 | 0.069 |
| C12-N25 | $\pi$      | C9-C13  | $\pi^*$      | 15.44 | 0.42 | 0.073 |
| C13-H14 | $\partial$ | C3-C9   | $\partial^*$ | 5.43  | 1.18 | 0.072 |
| C15-C16 | $\partial$ | C15-C17 | $\partial^*$ | 4.83  | 1.38 | 0.073 |
| C15-C17 | $\partial$ | C15-C16 | $\partial^*$ | 4.73  | 1.38 | 0.072 |
| C15-C17 | $\partial$ | C17-C20 | $\partial^*$ | 5.01  | 1.41 | 0.075 |
| C15-C17 | $\partial$ | C20-N26 | $\partial^*$ | 6.38  | 1.25 | 0.080 |
| C15-C17 | $\pi$      | C12-N25 | $\pi^*$      | 19.67 | 0.35 | 0.074 |
| C15-C17 | $\pi$      | C16-C18 | $\pi^*$      | 24.16 | 0.38 | 0.086 |
| C16-C18 | $\partial$ | C22-C32 | $\partial^*$ | 5.23  | 1.35 | 0.075 |
| C16-C18 | $\pi$      | C15-C17 | $\pi^*$      | 29.94 | 0.36 | 0.095 |
| C16-H19 | $\partial$ | C15-C17 | $\partial^*$ | 5.16  | 1.21 | 0.070 |
| C17-C20 | $\partial$ | C15-C17 | $\partial^*$ | 4.81  | 1.42 | 0.074 |
| C17-C20 | $\partial$ | C20-C22 | $\partial^*$ | 6.09  | 1.39 | 0.082 |
| C17-H21 | $\partial$ | C20-C22 | $\partial^*$ | 5.06  | 1.20 | 0.070 |
| C18-C22 | $\partial$ | C22-C32 | $\partial^*$ | 5.90  | 1.35 | 0.080 |
| C20-C22 | $\partial$ | C17-C20 | $\partial^*$ | 5.56  | 1.38 | 0.079 |
| C20-C22 | $\partial$ | N26-C37 | $\partial^*$ | 5.36  | 1.22 | 0.072 |
| C20-C22 | $\partial$ | C31-C32 | $\partial^*$ | 5.29  | 1.38 | 0.077 |
| C22-C32 | $\partial$ | C18-C22 | $\partial^*$ | 5.24  | 1.36 | 0.076 |
| C22-C32 | $\partial$ | C31-C32 | $\partial^*$ | 5.25  | 1.36 | 0.076 |
| C27-C28 | $\partial$ | C27-C32 | $\partial^*$ | 5.89  | 1.39 | 0.081 |
| C27-C32 | $\partial$ | C18-C22 | $\partial^*$ | 5.39  | 1.38 | 0.077 |
| C27-C32 | $\partial$ | N26-C37 | $\partial^*$ | 5.46  | 1.22 | 0.073 |
| C27-C32 | $\partial$ | C27-C28 | $\partial^*$ | 5.38  | 1.38 | 0.077 |
| C27-C32 | $\pi$      | C28-C29 | $\pi^*$      | 26.54 | 0.36 | 0.089 |
| C27-C32 | $\pi$      | C30-C31 | $\pi^*$      | 30.23 | 0.37 | 0.096 |
| C28-C29 | $\partial$ | N26-C27 | $\partial^*$ | 6.94  | 1.25 | 0.083 |
| C28-C29 | $\pi$      | C27-C32 | $\pi^*$      | 30.73 | 0.36 | 0.098 |
| C28-C29 | $\pi$      | C30-C31 | $\pi^*$      | 25.57 | 0.37 | 0.088 |
| C30-C31 | $\pi$      | C28-C29 | $\pi^*$      | 31.34 | 0.37 | 0.096 |
| C37-C38 | $\pi$      | C40-C42 | $\pi^*$      | 20.28 | 0.40 | 0.084 |
| C38-C40 | $\partial$ | N26-C37 | $\partial^*$ | 7.16  | 1.24 | 0.084 |
| C40-C42 | $\pi$      | C37-C38 | $\pi^*$      | 22.55 | 0.39 | 0.086 |
| C40-C42 | $\pi$      | C44-C45 | $\pi^*$      | 17.25 | 0.38 | 0.075 |
| C47-C49 | $\pi$      | C51-C53 | $\pi^*$      | 32.17 | 0.38 | 0.100 |
| C3      | LP(1)      | C1-C2   | $\pi^*$      | 61.09 | 0.20 | 0.125 |



|     |       |         |            |       |      |       |
|-----|-------|---------|------------|-------|------|-------|
| C3  | LP(1) | C9-C13  | $\pi^*$    | 72.83 | 0.18 | 0.126 |
| C22 | LP(1) | C16-C18 | $\pi^*$    | 78.49 | 0.19 | 0.133 |
| C22 | LP(1) | C27-C32 | $\pi^*$    | 63.01 | 0.17 | 0.107 |
| N26 | LP(1) | C27-C32 | $\pi^*$    | 40.43 | 0.37 | 0.113 |
| S39 | LP(2) | C37-C38 | $\pi^*$    | 30.71 | 0.35 | 0.094 |
| S39 | LP(2) | C40-C42 | $\pi^*$    | 31.79 | 0.35 | 0.094 |
| S46 | LP(2) | C44-C45 | $\pi^*$    | 35.66 | 0.34 | 0.099 |
| O57 | LP(2) | C56-O59 | $\pi^*$    | 54.99 | 0.45 | 0.143 |
| O59 | LP(2) | C56-O57 | $\delta^*$ | 37.52 | 0.74 | 0.151 |

<sup>a</sup> E(2) means energy of hyper conjugative interaction (stabilization energy).

<sup>b</sup> Energy difference between donor and acceptor i and j NBO orbitals.

<sup>c</sup> F(i,j) is the Fock matrix element between i and j NBO orbitals.

**Table S13: Natural bond orbital (NBO) analysis of compound Q2 by using CAM-B3LYP/6-311G (d, p).**

| Donor (i)                        | Type     | Acceptor(j)                      | Type       | E(2) <sup>a</sup> [kJ/mol] | E(j)-E(i) <sup>b</sup> [a.u.] | F(i,j) <sup>c</sup> [a.u.] |
|----------------------------------|----------|----------------------------------|------------|----------------------------|-------------------------------|----------------------------|
| C <sub>1</sub> -C <sub>2</sub>   | $\pi$    | C <sub>3</sub> -C <sub>4</sub>   | $\pi^*$    | 22.93                      | 0.37                          | 0.086                      |
| C <sub>1</sub> -C <sub>2</sub>   | $\pi$    | C <sub>5</sub> -C <sub>6</sub>   | $\pi^*$    | 25.19                      | 0.39                          | 0.089                      |
| C <sub>1</sub> -H <sub>7</sub>   | $\sigma$ | C <sub>2</sub> -C <sub>3</sub>   | $\sigma^*$ | 5.15                       | 1.19                          | 0.070                      |
| C <sub>2</sub> -C <sub>3</sub>   | $\sigma$ | C <sub>3</sub> -C <sub>8</sub>   | $\sigma^*$ | 5.04                       | 1.35                          | 0.074                      |
| C <sub>3</sub> -C <sub>4</sub>   | $\pi$    | C <sub>1</sub> -C <sub>2</sub>   | $\pi^*$    | 23.49                      | 0.36                          | 0.087                      |
| C <sub>3</sub> -C <sub>4</sub>   | $\pi$    | C <sub>5</sub> -C <sub>6</sub>   | $\pi^*$    | 20.14                      | 0.37                          | 0.081                      |
| C <sub>3</sub> -C <sub>4</sub>   | $\pi$    | C <sub>8</sub> -C <sub>12</sub>  | $\pi^*$    | 25.47                      | 0.36                          | 0.091                      |
| C <sub>3</sub> -C <sub>4</sub>   | $\pi$    | C <sub>11</sub> -N <sub>23</sub> | $\pi^*$    | 20.03                      | 0.34                          | 0.076                      |
| C <sub>8</sub> -C <sub>12</sub>  | $\pi$    | C <sub>11</sub> -N <sub>23</sub> | $\pi^*$    | 34.83                      | 0.37                          | 0.103                      |
| C <sub>11</sub> -N <sub>23</sub> | $\pi$    | C <sub>3</sub> -C <sub>4</sub>   | $\pi^*$    | 28.09                      | 0.42                          | 0.103                      |
| C <sub>15</sub> -C <sub>17</sub> | $\sigma$ | C <sub>21</sub> -C <sub>30</sub> | $\sigma^*$ | 5.22                       | 1.36                          | 0.075                      |
| C <sub>25</sub> -C <sub>30</sub> | $\pi$    | C <sub>28</sub> -C <sub>29</sub> | $\pi^*$    | 31.41                      | 0.36                          | 0.097                      |
| C <sub>26</sub> -C <sub>27</sub> | $\sigma$ | N <sub>24</sub> -C <sub>25</sub> | $\sigma^*$ | 6.53                       | 1.28                          | 0.082                      |
| C <sub>28</sub> -C <sub>29</sub> | $\pi$    | C <sub>26</sub> -C <sub>27</sub> | $\pi^*$    | 31.09                      | 0.37                          | 0.096                      |
| C <sub>38</sub> -C <sub>41</sub> | $\pi$    | N <sub>36</sub> -C <sub>37</sub> | $\pi^*$    | 30.75                      | 0.37                          | 0.097                      |
| C <sub>39</sub> -C <sub>43</sub> | $\pi$    | C <sub>38</sub> -C <sub>41</sub> | $\pi^*$    | 31.40                      | 0.36                          | 0.097                      |
| C <sub>45</sub> -C <sub>46</sub> | $\pi$    | C <sub>47</sub> -C <sub>49</sub> | $\pi^*$    | 31.39                      | 0.36                          | 0.097                      |
| C <sub>47</sub> -C <sub>49</sub> | $\pi$    | C <sub>48</sub> -C <sub>51</sub> | $\pi^*$    | 31.09                      | 0.37                          | 0.096                      |
| N <sub>23</sub>                  | LP(1)    | C <sub>3</sub> -C <sub>4</sub>   | $\sigma^*$ | 11.40                      | 0.99                          | 0.096                      |
| N <sub>23</sub>                  | LP(1)    | C <sub>11</sub> -C <sub>12</sub> | $\sigma^*$ | 11.48                      | 0.99                          | 0.096                      |
| N <sub>24</sub>                  | LP(1)    | C <sub>19</sub> -C <sub>21</sub> | $\pi^*$    | 46.22                      | 0.36                          | 0.120                      |
| N <sub>24</sub>                  | LP(1)    | C <sub>25</sub> -C <sub>30</sub> | $\pi^*$    | 46.95                      | 0.36                          | 0.121                      |
| N <sub>55</sub>                  | LP(1)    | C <sub>39</sub> -C <sub>43</sub> | $\pi^*$    | 47.19                      | 0.36                          | 0.121                      |
| N <sub>55</sub>                  | LP(1)    | C <sub>45</sub> -C <sub>46</sub> | $\pi^*$    | 46.50                      | 0.37                          | 0.120                      |
| C <sub>14</sub> -C <sub>16</sub> | $\pi$    | C <sub>15</sub> -C <sub>17</sub> | $\pi^*$    | 326.79                     | 0.01                          | 0.095                      |
| C <sub>25</sub> -C <sub>30</sub> | $\pi$    | C <sub>26</sub> -C <sub>27</sub> | $\pi^*$    | 386.06                     | 0.01                          | 0.095                      |
| C <sub>45</sub> -C <sub>46</sub> | $\pi$    | C <sub>48</sub> -C <sub>51</sub> | $\pi^*$    | 391.20                     | 0.01                          | 0.095                      |

<sup>a</sup> E(2) means energy of hyper conjugative interaction (stabilization energy).

<sup>b</sup> Energy difference between donor and acceptor i and j NBO orbitals.

<sup>c</sup> F(i,j) is the Fock matrix element between i and j NBO orbitals.

**Table S14: Natural bond orbital (NBO) analysis of compound Q2D1 by using CAM-B3LYP/6-311G (d, p).**

| Donor(i) | Type     | Acceptor(j) | Type       | E(2)  | E(J)E(i) <sup>b</sup> (a.u) | F(I,j) <sup>c</sup> (a.u) |
|----------|----------|-------------|------------|-------|-----------------------------|---------------------------|
| C73-O75  | $\sigma$ | C73-O77     | $\sigma^*$ | 0.50  | 1.66                        | 0.026                     |
| C1-C2    | $\pi$    | C3-C4       | $\pi^*$    | 22.74 | 0.37                        | 0.085                     |
| C1-C2    | $\pi$    | C5-C6       | $\pi^*$    | 25.07 | 0.39                        | 0.089                     |
| C1-H7    | $\sigma$ | C2-C3       | $\sigma^*$ | 5.23  | 1.19                        | 0.070                     |
| C2-C3    | $\sigma$ | C3-C8       | $\sigma^*$ | 4.99  | 1.35                        | 0.073                     |
| C2-H56   | $\sigma$ | C3-C4       | $\sigma^*$ | 4.91  | 1.18                        | 0.068                     |
| C3-C4    | $\pi$    | C1-C2       | $\pi^*$    | 23.51 | 0.36                        | 0.081                     |
| C3-C4    | $\pi$    | C5-C6       | $\pi^*$    | 20.02 | 0.37                        | 0.091                     |
| C3-C4    | $\pi$    | C8-C12      | $\pi^*$    | 25.50 | 0.36                        | 0.091                     |
| C3-C8    | $\sigma$ | C36-C37     | $\pi^*$    | 0.65  | 0.81                        | 0.022                     |
| C5-C6    | $\pi$    | C1-C2       | $\pi^*$    | 24.50 | 0.39                        | 0.087                     |
| C5-C6    | $\pi$    | C3-C4       | $\pi^*$    | 24.75 | 0.37                        | 0.089                     |
| C5-H9    | $\sigma$ | C3-C4       | $\sigma^*$ | 5.04  | 1.17                        | 0.069                     |
| C6-H10   | $\sigma$ | C4-C5       | $\sigma^*$ | 4.87  | 1.19                        | 0.068                     |
| C8-C12   | $\pi$    | C11-N23     | $\pi^*$    | 34.85 | 0.37                        | 0.102                     |
| C11-N23  | $\pi$    | C3-C4       | $\pi^*$    | 28.29 | 0.42                        | 0.103                     |
| C12-H13  | $\sigma$ | C3-C8       | $\sigma^*$ | 5.36  | 1.18                        | 0.071                     |
| C14-C16  | $\sigma$ | C19-N24     | $\sigma^*$ | 5.97  | 1.28                        | 0.078                     |
| C14-C16  | $\pi$    | C15-C17     | $\pi^*$    | 23.75 | 0.38                        | 0.085                     |
| C14-C16  | $\pi$    | C19-C21     | $\pi^*$    | 28.58 | 0.36                        | 0.094                     |
| C15-C17  | $\sigma$ | C21-C30     | $\sigma^*$ | 5.16  | 1.36                        | 0.075                     |
| C15-C17  | $\pi$    | C14-C16     | $\pi^*$    | 29.77 | 0.37                        | 0.095                     |
| C15-H18  | $\sigma$ | C14-C16     | $\sigma^*$ | 5.08  | 1.21                        | 0.070                     |
| C16-C19  | $\sigma$ | C19-C21     | $\sigma^*$ | 5.46  | 1.38                        | 0.077                     |
| C17-C21  | $\sigma$ | C21-C30     | $\sigma^*$ | 5.99  | 1.36                        | 0.081                     |
| C19-C21  | $\sigma$ | C16-C19     | $\sigma^*$ | 5.11  | 1.37                        | 0.075                     |
| C19-C21  | $\sigma$ | C29-C30     | $\sigma^*$ | 5.47  | 1.37                        | 0.078                     |
| C21-C30  | $\sigma$ | C17-C21     | $\sigma^*$ | 5.32  | 1.36                        | 0.076                     |
| C21-C30  | $\sigma$ | C29-C30     | $\sigma^*$ | 5.37  | 1.36                        | 0.077                     |
| C25-C26  | $\sigma$ | C25-C30     | $\sigma^*$ | 5.34  | 1.37                        | 0.077                     |
| C25-C30  | $\sigma$ | C17-C21     | $\sigma^*$ | 5.56  | 1.37                        | 0.078                     |
| C25-C30  | $\pi$    | C26-C27     | $\pi^*$    | 26.02 | 0.35                        | 0.087                     |
| C25-C30  | $\pi$    | C28-C29     | $\pi^*$    | 31.57 | 0.36                        | 0.097                     |
| C26-C27  | $\sigma$ | N24-C25     | $\sigma^*$ | 6.47  | 1.29                        | 0.081                     |
| C28-C29  | $\sigma$ | C21-C30     | $\sigma^*$ | 5.30  | 1.36                        | 0.076                     |
| C29-C30  | $\sigma$ | C21-C30     | $\sigma^*$ | 6.08  | 1.35                        | 0.081                     |
| C29-C30  | $\sigma$ | C25-C30     | $\sigma^*$ | 4.97  | 1.36                        | 0.074                     |
| C36-C37  | $\sigma$ | C39-N55     | $\sigma^*$ | 6.35  | 1.24                        | 0.079                     |
| C37-C39  | $\sigma$ | C39-C43     | $\sigma^*$ | 6.10  | 1.39                        | 0.082                     |
| C37-H40  | $\sigma$ | C39-C43     | $\sigma^*$ | 4.98  | 1.19                        | 0.069                     |
| C39-C43  | $\sigma$ | C37-C39     | $\sigma^*$ | 5.62  | 1.38                        | 0.079                     |
| C46-C48  | $\pi$    | C49-C51     | $\pi^*$    | 33.48 | 0.37                        | 0.099                     |
| C48-C51  | $\sigma$ | C46-N55     | $\sigma^*$ | 6.88  | 1.25                        | 0.083                     |

|         |            |         |              |       |      |       |
|---------|------------|---------|--------------|-------|------|-------|
| C58-C60 | $\partial$ | N55-C57 | $\partial^*$ | 6.99  | 1.23 | 0.083 |
| C58-H61 | $\partial$ | C57-S59 | $\partial^*$ | 6.40  | 0.85 | 0.066 |
| C60-H63 | $\partial$ | S59-C62 | $\partial^*$ | 6.26  | 0.86 | 0.066 |
| C65-C67 | $\partial$ | C62-C64 | $\partial^*$ | 6.13  | 1.32 | 0.080 |
| N24     | $\partial$ | C19-C21 | $\pi^*$      | 46.32 | 0.36 | 0.120 |
| N24     | LP(1)      | C25-C30 | $\pi^*$      | 47.32 | 0.36 | 0.121 |
| N55     | LP(1)      | C39-C43 | $\pi^*$      | 38.91 | 0.38 | 0.111 |
| N55     | LP(1)      | C46-C48 | $\pi^*$      | 43.09 | 0.38 | 0.116 |
| S66     | LP(2)      | C64-C65 | $\pi^*$      | 35.90 | 0.34 | 0.100 |
| S66     | LP(2)      | C67-C69 | $\pi^*$      | 30.83 | 0.33 | 0.091 |
| O77     | LP(2)      | C73-O75 | $\partial^*$ | 34.12 | 0.77 | 0.146 |
| O78     | LP(2)      | C74-O80 | $\pi^*$      | 58.35 | 0.44 | 0.146 |
| O80     | LP(2)      | C74-O78 | $\partial^*$ | 36.63 | 0.75 | 0.150 |

<sup>a</sup> E(2) means energy of hyper conjugative interaction (stabilization energy).

<sup>b</sup> Energy difference between donor and acceptor i and j NBO orbitals.

<sup>c</sup> F(i,j) is the Fock matrix element between i and j NBO orbitals.

**Table S15: Natural bond orbital (NBO) analysis of compound Q2D2 by using CAM-B3LYP/6-311G (d, p).**

| Donor(i) | Type       | Acceptor(j) | Type         | E(2)(kcal/mol) | E(J)E(i) <sup>b</sup> (a.u) | F(I,j) <sup>c</sup> (a.u) |
|----------|------------|-------------|--------------|----------------|-----------------------------|---------------------------|
| C1-C2    | $\partial$ | C2-C3       | $\partial^*$ | 4.17           | 1.39                        | 0.068                     |
| C1-C2    | $\pi$      | C3-C4       | $\pi^*$      | 22.97          | 0.37                        | 0.086                     |
| C1-C2    | $\pi$      | C5-C6       | $\pi^*$      | 25.13          | 0.39                        | 0.089                     |
| C1-H7    | $\partial$ | C2-C3       | $\partial^*$ | 5.15           | 1.19                        | 0.070                     |
| C2-C3    | $\partial$ | C3-C4       | $\partial^*$ | 4.33           | 1.35                        | 0.068                     |
| C2-C3    | $\partial$ | C3-C8       | $\partial^*$ | 5.05           | 1.35                        | 0.074                     |
| C3-C4    | $\partial$ | C3-C8       | $\partial^*$ | 4.39           | 1.34                        | 0.069                     |
| C3-C4    | $\pi$      | C1-C2       | $\pi^*$      | 23.43          | 0.36                        | 0.087                     |
| C3-C4    | $\pi$      | C5-C6       | $\pi^*$      | 20.10          | 0.37                        | 0.081                     |
| C3-C4    | $\pi$      | C8-C12      | $\pi^*$      | 25.52          | 0.36                        | 0.091                     |
| C3-C8    | $\partial$ | C36-C37     | $\pi^*$      | 0.78           | 0.82                        | 0.024                     |
| C5-C6    | $\pi$      | C3-C4       | $\pi^*$      | 24.76          | 0.37                        | 0.089                     |
| C5-H9    | $\partial$ | C3-C4       | $\partial^*$ | 5.01           | 1.17                        | 0.069                     |
| C8-C12   | $\pi$      | C11-N23     | $\pi^*$      | 34.49          | 0.37                        | 0.102                     |
| C11-N23  | $\pi$      | C3-C4       | $\pi^*$      | 28.09          | 0.42                        | 0.103                     |
| C12-H13  | $\partial$ | C3-C8       | $\partial^*$ | 5.44           | 1.19                        | 0.072                     |
| C14-C16  | $\pi$      | C19-C21     | $\pi^*$      | 29.05          | 0.36                        | 0.095                     |
| C15-C17  | $\partial$ | C21-C30     | $\partial^*$ | 5.22           | 1.36                        | 0.075                     |
| C17-C21  | $\partial$ | C21-C30     | $\partial^*$ | 5.99           | 1.35                        | 0.080                     |
| C25-C30  | $\pi$      | C28-C29     | $\pi^*$      | 31.38          | 0.36                        | 0.097                     |
| C29-C30  | $\partial$ | C21-C30     | $\partial^*$ | 6.02           | 1.35                        | 0.081                     |
| C36-C37  | $\partial$ | C8-C12      | $\pi^*$      | 1.15           | 0.84                        | 0.029                     |
| C36-C38  | $\partial$ | C8-C12      | $\pi^*$      | 1.20           | 0.84                        | 0.030                     |
| C39-N55  | $\partial$ | C57-C58     | $\pi^*$      | 1.70           | 0.90                        | 0.038                     |
| C46-N55  | $\partial$ | C57-C58     | $\pi^*$      | 1.42           | 0.90                        | 0.034                     |
| C47-C49  | $\pi$      | C48-C51     | $\pi^*$      | 31.35          | 0.37                        | 0.096                     |
| C60-C62  | $\partial$ | N55-C57     | $\partial^*$ | 0.57           | 1.30                        | 0.024                     |

|         |            |         |              |       |      |       |
|---------|------------|---------|--------------|-------|------|-------|
| C67-C69 | $\pi$      | C71-C73 | $\pi^*$      | 33.92 | 0.38 | 0.101 |
| C71-H72 | $\partial$ | C67-C69 | $\partial^*$ | 6.22  | 1.23 | 0.078 |
| C71-C73 | $\pi$      | C75-N76 | $\pi^*$      | 25.75 | 0.49 | 0.103 |
| C73-C74 | $\partial$ | C74-N77 | $\partial^*$ | 9.50  | 1.78 | 0.117 |
| C73-C75 | $\partial$ | C75-N76 | $\partial^*$ | 9.51  | 1.78 | 0.117 |
| C74-N77 | $\partial$ | C73-C74 | $\partial^*$ | 8.57  | 1.69 | 0.108 |
| C74-N77 | $\pi$      | C71-C73 | $\partial^*$ | 2.78  | 1.05 | 0.048 |
| C74-N77 | $\pi$      | C73-C75 | $\partial^*$ | 3.70  | 0.97 | 0.054 |
| N24     | LP(1)      | C25-C30 | $\pi^*$      | 46.86 | 0.36 | 0.121 |
| N55     | LP(1)      | C39-C43 | $\pi^*$      | 40.41 | 0.37 | 0.113 |
| N55     | LP(1)      | C45-C46 | $\pi^*$      | 39.97 | 0.37 | 0.113 |
| S66     | LP(2)      | C64-C65 | $\pi^*$      | 35.36 | 0.34 | 0.099 |
| S66     | LP(2)      | C67-C69 | $\pi^*$      | 29.10 | 0.34 | 0.089 |

<sup>a</sup> E(2) means energy of hyper conjugative interaction (stabilization energy).

<sup>b</sup> Energy difference between donor and acceptor i and j NBO orbitals.

<sup>c</sup> F(i,j) is the Fock matrix element between i and j NBO orbitals.

**Table S16: Natural bond orbital (NBO) analysis of compound Q2D3 by using CAM-B3LYP/6-311G (d, p).**

| Donor(i) | Type       | Acceptor(j) | Type         | E(2)  | E(J)E(i) <sup>b</sup> (a.u) | F(I,j) <sup>c</sup> (a.u) |
|----------|------------|-------------|--------------|-------|-----------------------------|---------------------------|
| C1-C2    | $\partial$ | C2-C3       | $\partial^*$ | 4.20  | 1.39                        | 0.068                     |
| C1-C2    | $\pi$      | C3-C4       | $\pi^*$      | 22.71 | 0.37                        | 0.085                     |
| C1-C2    | $\pi$      | C5-C6       | $\pi^*$      | 25.07 | 0.39                        | 0.089                     |
| C1-H7    | $\partial$ | C2-C3       | $\partial^*$ | 5.23  | 1.19                        | 0.070                     |
| C3-C4    | $\pi$      | C1-C2       | $\pi^*$      | 23.49 | 0.36                        | 0.087                     |
| C3-C4    | $\pi$      | C5-C6       | $\pi^*$      | 20.02 | 0.37                        | 0.081                     |
| C3-C4    | $\pi$      | C8-C12      | $\pi^*$      | 25.39 | 0.36                        | 0.091                     |
| C5-C6    | $\pi$      | C1-C2       | $\pi^*$      | 24.50 | 0.39                        | 0.087                     |
| C5-H9    | $\partial$ | C3-C4       | $\partial^*$ | 5.05  | 1.17                        | 0.069                     |
| C8-C12   | $\pi$      | C3-C4       | $\pi^*$      | 18.33 | 0.37                        | 0.077                     |
| C8-C12   | $\pi$      | C11-N23     | $\pi^*$      | 34.83 | 0.37                        | 0.102                     |
| C8-C12   | $\pi$      | C36-C37     | $\pi^*$      | 6.90  | 0.38                        | 0.047                     |
| C11-N23  | $\pi$      | C3-C4       | $\pi^*$      | 28.22 | 0.42                        | 0.103                     |
| C11-N23  | $\pi$      | C8-C12      | $\pi^*$      | 14.28 | 0.44                        | 0.071                     |
| C12-H13  | $\partial$ | C3-C8       | $\partial^*$ | 5.37  | 1.18                        | 0.071                     |
| C14-C16  | $\partial$ | C19-N24     | $\partial^*$ | 5.96  | 1.28                        | 0.078                     |
| C14-C16  | $\pi$      | C15-C17     | $\pi^*$      | 23.76 | 0.38                        | 0.085                     |
| C14-C16  | $\pi$      | C19-C21     | $\pi^*$      | 28.49 | 0.36                        | 0.094                     |
| C15-C17  | $\partial$ | C21-C30     | $\partial^*$ | 5.14  | 1.36                        | 0.075                     |
| C15-C17  | $\pi$      | C14-C16     | $\pi^*$      | 29.94 | 0.37                        | 0.095                     |
| C15-H18  | $\partial$ | C14-C16     | $\partial^*$ | 5.08  | 1.21                        | 0.070                     |
| C16-C19  | $\partial$ | C19-C21     | $\partial^*$ | 5.40  | 1.37                        | 0.077                     |
| C17-C21  | $\partial$ | C21-C30     | $\partial^*$ | 5.99  | 1.36                        | 0.081                     |
| C17-H22  | $\partial$ | C19-C21     | $\partial^*$ | 5.06  | 1.18                        | 0.069                     |
| C19-C21  | $\partial$ | C16-C19     | $\partial^*$ | 5.05  | 1.37                        | 0.075                     |
| C19-C21  | $\partial$ | C29-C30     | $\partial^*$ | 5.48  | 1.37                        | 0.078                     |

|         |            |         |              |       |      |       |
|---------|------------|---------|--------------|-------|------|-------|
| C19-C21 | $\pi$      | C15-C17 | $\pi^*$      | 29.79 | 0.36 | 0.096 |
| C19-C21 | $\pi$      | C25-C30 | $\pi^*$      | 22.44 | 0.35 | 0.080 |
| C21-C30 | $\partial$ | C17-C21 | $\partial^*$ | 5.33  | 1.36 | 0.076 |
| C25-C30 | $\pi$      | C19-C21 | $\pi^*$      | 23.62 | 0.34 | 0.082 |
| C25-C30 | $\pi$      | C26-C27 | $\pi^*$      | 25.91 | 0.36 | 0.087 |
| C25-C30 | $\pi$      | C28-C29 | $\pi^*$      | 31.45 | 0.36 | 0.097 |
| C26-C27 | $\partial$ | N24-C25 | $\partial^*$ | 6.45  | 1.29 | 0.081 |
| C26-C27 | $\pi$      | C25-C30 | $\pi^*$      | 28.93 | 0.36 | 0.096 |
| C26-C27 | $\pi$      | C28-C29 | $\pi^*$      | 24.67 | 0.37 | 0.087 |
| C28-C29 | $\pi$      | C25-C30 | $\pi^*$      | 23.76 | 0.36 | 0.086 |
| C28-C29 | $\pi$      | C26-C27 | $\pi^*$      | 30.68 | 0.37 | 0.096 |
| C29-C30 | $\partial$ | C21-C30 | $\partial^*$ | 6.08  | 1.35 | 0.081 |
| C29-H34 | $\partial$ | C25-C30 | $\partial^*$ | 5.07  | 1.18 | 0.069 |
| C36-C37 | $\pi$      | C3-C8   | $\partial^*$ | 2.22  | 0.89 | 0.043 |
| C36-C37 | $\pi$      | C8-C12  | $\partial^*$ | 1.63  | 0.96 | 0.038 |
| C36-C37 | $\pi$      | C38-C41 | $\pi^*$      | 25.00 | 0.37 | 0.086 |
| C36-C37 | $\pi$      | C39-C43 | $\pi^*$      | 30.11 | 0.36 | 0.096 |
| C37-C39 | $\partial$ | C39-C43 | $\partial^*$ | 6.08  | 1.39 | 0.082 |
| C38-C41 | $\partial$ | C43-C45 | $\partial^*$ | 5.23  | 1.35 | 0.075 |
| C38-C41 | $\pi$      | C36-C37 | $\pi^*$      | 30.25 | 0.37 | 0.096 |
| C39-C43 | $\pi$      | C36-C37 | $\pi^*$      | 28.41 | 0.36 | 0.091 |
| C39-C43 | $\pi$      | C38-C41 | $\pi^*$      | 29.71 | 0.37 | 0.095 |
| C41-C43 | $\partial$ | C39-C43 | $\partial^*$ | 5.28  | 1.37 | 0.076 |
| C45-C47 | $\pi$      | C46-C48 | $\pi^*$      | 31.00 | 0.35 | 0.094 |
| C45-C47 | $\pi$      | C49-C51 | $\pi^*$      | 29.29 | 0.36 | 0.091 |
| C46-C48 | $\pi$      | C49-C51 | $\pi^*$      | 33.30 | 0.37 | 0.099 |
| C46-N55 | $\partial$ | C57-C58 | $\pi^*$      | 0.70  | 0.90 | 0.024 |
| C48-C51 | $\partial$ | C46-N55 | $\partial^*$ | 6.92  | 1.25 | 0.083 |
| C49-C51 | $\pi$      | C45-C47 | $\pi^*$      | 33.44 | 0.36 | 0.099 |
| C60-C62 | $\pi$      | C57-C58 | $\pi^*$      | 20.89 | 0.39 | 0.084 |
| C60-H63 | $\partial$ | S59-C62 | $\partial^*$ | 6.24  | 0.86 | 0.066 |
| C64-C65 | $\pi$      | C67-C69 | $\pi^*$      | 28.85 | 0.37 | 0.096 |
| C65-C67 | $\partial$ | C62-C64 | $\partial^*$ | 6.03  | 1.32 | 0.080 |
| C67-C69 | $\partial$ | C69-C71 | $\partial^*$ | 5.18  | 1.38 | 0.076 |
| C67-C69 | $\pi$      | C71-C72 | $\pi^*$      | 34.54 | 0.39 | 0.105 |
| C71-C72 | $\pi$      | C67-C69 | $\pi^*$      | 11.08 | 0.39 | 0.061 |
| C71-C72 | $\pi$      | C73-N79 | $\pi^*$      | 27.90 | 0.49 | 0.107 |
| C71-H78 | $\partial$ | S66-C69 | $\partial^*$ | 8.92  | 0.85 | 0.078 |
| C71-H78 | $\partial$ | C72-C73 | $\partial^*$ | 7.59  | 1.16 | 0.084 |
| C72-C73 | $\partial$ | C73-N79 | $\partial^*$ | 10.18 | 1.79 | 0.121 |
| C73-N79 | $\partial$ | C72-C73 | $\partial^*$ | 8.41  | 1.72 | 0.108 |
| C73-N79 | $\pi$      | C71-C72 | $\pi^*$      | 8.00  | 0.48 | 0.058 |
| N23     | LP(1)      | C11-C12 | $\partial^*$ | 11.54 | 0.99 | 0.096 |
| N24     | LP(1)      | C19-C21 | $\pi^*$      | 47.48 | 0.36 | 0.121 |
| N55     | LP(1)      | C39-C43 | $\pi^*$      | 38.44 | 0.38 | 0.111 |
| N55     | LP(1)      | C46-C48 | $\pi^*$      | 42.93 | 0.38 | 0.116 |
| S59     | LP(2)      | C57-C58 | $\pi^*$      | 31.00 | 0.35 | 0.094 |
| S66     | LP(2)      | C64-C65 | $\pi^*$      | 35.25 | 0.34 | 0.100 |

|     |       |         |              |       |      |       |
|-----|-------|---------|--------------|-------|------|-------|
| S66 | LP(2) | C67-C69 | $\pi^*$      | 30.29 | 0.34 | 0.091 |
| O75 | LP(2) | C74-O77 | $\pi^*$      | 57.92 | 0.45 | 0.146 |
| O77 | LP(2) | C72-C74 | $\partial^*$ | 22.63 | 0.80 | 0.122 |
| O77 | LP(2) | C74-O75 | $\partial^*$ | 36.85 | 0.75 | 0.150 |
| N79 | LP(1) | C72-C73 | $\partial^*$ | 10.77 | 1.16 | 0.100 |

<sup>a</sup> E(2) means energy of hyper conjugative interaction (stabilization energy).

<sup>b</sup> Energy difference between donor and acceptor i and j NBO orbitals.

<sup>c</sup> F(i,j) is the Fock matrix element between i and j NBO orbitals.

**Table S17:** Wave length, excitation energy and oscillator strength of investigated compound **Q1**

| $\lambda$ (nm) | E(eV)   | $f_{os}$ | MO contributions                                                       |
|----------------|---------|----------|------------------------------------------------------------------------|
| 321.17         | 3.86040 | 1.447    | H-1→L (83%) H-3→L (5%), H-1→L+1 (4%)                                   |
| 313.46         | 3.95530 | 0.086    | H→L (63%), H→L+1 (22%)H-1→L+4 (4%), H→L+2 (6%)                         |
| 283.26         | 4.37710 | 0.084    | H-2→L (11%), H-1→L+1 (46%)H-3→L+1 (3%),H-2→L+1 (5%), H-2→L+2 (8%)      |
| 276.25         | 4.48820 | 0.511    | H-1→L+1 (13%)H-5→L (2%), H-2→L+1 (5%), H-1→L+2 (4%)                    |
| 270.80         | 4.57840 | 0.004    | H-5→L+5 (2%), H-2→L (2%)                                               |
| 254.51         | 4.87160 | 0.403    | H→L+1 (44%), H→L+2 (11%)H-5→L (2%), H-4→L (4%), H-3→L (2%), H→L+4 (5%) |

MO=molecular orbital, H=HOMO, L=LUMO,  $f$ = oscillator strength

**Table S18:** Wave length, excitation energy and oscillator strength of investigated compound **Q1D1**

| $\lambda$ (nm) | E(eV)   | $f$   | MO contributions                                                                                |
|----------------|---------|-------|-------------------------------------------------------------------------------------------------|
| 405.005        | 3.06130 | 1.353 | H-2→L (29%), H→L (66%)                                                                          |
| 319.687        | 3.87830 | 1.438 | H-1→L+1 (85%)H-4→L+1 (4%), H-1→L+2 (3%)                                                         |
| 308.464        | 4.01940 | 0.090 | H-2→L+1 (25%), H→L+1 (39%), H→L+2 (11%)H-2→L+2 (8%), H-2→L+4 (2%), H→L+4 (3%)                   |
| 304.727        | 4.06870 | 0.024 | H-2→L (53%), H→L (22%), H→L+3 (13%)H-2→L+3 (3%)                                                 |
| 283.931        | 4.36670 | 0.021 | H-6→L (59%), H-5→L (11%) H-8→L (3%), H-7→L (7%), H-2→L+3 (5%), H→L+3 (5%)                       |
| 283.043        | 4.38040 | 0.046 | H-4→L+1 (18%), H-3→L+1 (20%), H-1→L+2 (36%)H-4→L+2 (4%), H-3→L+2 (2%), H-3→L+4 (8%), H-1→L (2%) |

MO=molecular orbital, H=HOMO, L=LUMO,  $f$ = oscillator strength

**Table S19:** Wave length, excitation energy and oscillator strength of investigated compound **Q1D2**

| $\lambda$ (nm) | E(eV)   | $f$   | MO contributions                                                              |
|----------------|---------|-------|-------------------------------------------------------------------------------|
| 435.935        | 2.84410 | 1.450 | H-2→L (31%), H→L (65%)                                                        |
| 322.691        | 3.84220 | 0.114 | H-2→L (48%), H→L (19%), H→L+3 (14%)H-7→L (2%), H-6→L (3%), H-1→L+1 (7%)       |
| 319.136        | 3.88500 | 1.343 | H-1→L+1 (78%)H-4→L+1 (4%), H-2→L (4%), H-1→L+2 (2%), H→L (2%)                 |
| 309.775        | 4.00240 | 0.099 | H-2→L+1 (14%), H→L+1 (50%), H→L+2 (15%)H-2→L+2 (5%), H-1→L+6 (2%), H→L+4 (3%) |
| 297.503        | 4.16750 | 0.010 | H-1→L (92%)H-1→L+3 (4%)                                                       |
| 288.550        | 4.29680 | 0.056 | H-9→L (30%), H-7→L (10%), H-6→L (35%)H-8→L (4%),                              |

H-5→L (3%), H-2→L (3%), H-2→L+3 (6%), H→L+3 (4%)

MO=molecular orbital, H=HOMO, L=LUMO,  $f$ = oscillator strength

**Table S20:** Wave length, excitation energy and oscillator strength of investigated compound **Q2**

| $\lambda$ (nm) | E(eV)   | $f$   | MO contributions                                                                                                            |
|----------------|---------|-------|-----------------------------------------------------------------------------------------------------------------------------|
| 319.14         | 3.88500 | 1.459 | H-1→L (44%), H→L (32%) H-5→L(4%),H-3→L (3%),<br>H-2→L (4%), H-1→L+1 (4%)                                                    |
| 310.35         | 3.99500 | 0.062 | H-1→L (22%), H→L (37%), H→L+1 (19%)                                                                                         |
| 298.26         | 4.15690 | 0.383 | H-3→L (11%), H-2→L (33%), H-2→L+1 (16%),H-2→L+2<br>(19%) H-4→L (4%), H-3→L+4 (3%)                                           |
| 294.03         | 4.21670 | 0.832 | H-3→L (44%) H-4→L (9%), H-3→L+1 (9%), H-3→L+2<br>(5%), H-2→L(2%), H-2→L+1(4%),H-2→L+2(9%), H-<br>1→L+1 (2%), H→L+1 (2%)     |
| 282.19         | 4.39370 | 0.236 | H-5→L (19%), H-1→L+1 (27%), H→L+1 (13%)H-5→L+2<br>(2%), H-4→L (6%), H-4→L+3 (5%), H-2→L+1(6%), H-<br>1→L+2 (5%), H→L+2 (2%) |
| 271.77         | 4.56210 | 0.038 | H-8→L (82%) H-8→L+2 (3%)                                                                                                    |

MO=molecular orbital, H=H, L=L,  $f$ = oscillator strength

**Table S21:** Wave length, excitation energy and oscillator strength of investigated compound **Q2D1**

| $\lambda$ (nm) | E(eV)   | $f_{os}$ | MO contributions                                                                                                                    |
|----------------|---------|----------|-------------------------------------------------------------------------------------------------------------------------------------|
| 374.65         | 3.30930 | 1.078    | H-4→L (47%), H-2→L (45%) H-1→L (2%)                                                                                                 |
| 316.97         | 3.91160 | 1.283    | H-1→L+1 (69%)H-6→L+1 (6%), H-3→L+2 (2%),H-2→L+1<br>(2%), H-1→L+2 (8%), H→L+1 (5%)                                                   |
| 309.46         | 4.00650 | 0.082    | H→L+1 (47%), H→L+2 (32%) H-1→L+1(3%),H-1→L+9<br>(3%), H→L+4 (2%), H→L+5 (5%)                                                        |
| 300.65         | 4.12390 | 0.088    | H→L (86%)H-3→L+1 (4%), H-1→L (3%)                                                                                                   |
| 300.38         | 4.12760 | 1.217    | H-3→L+1 (63%)H-5→L+1 (6%), H-3→L+2 (6%), H-2→L+1<br>(3%), H→L (5%)                                                                  |
| 298.53         | 4.15320 | 0.165    | H-2→L+1 (35%), H-2→L+2 (17%), H-2→L+4 (13%) H-<br>4→L (4%), H-4→L+1 (5%), H-4→L+2 (3%), H-4→L+4<br>(2%), H-3→L+6 (2%), H-1→L+2 (2%) |

MO=molecular orbital, H=HOMO, L=LUMO,  $f$ = oscillator strength

**Table S22:** Wave length, excitation energy and oscillator strength of investigated compound **Q2D2**

| $\lambda$ (nm) | E(eV)   | $f$   | MO contributions                                                                  |
|----------------|---------|-------|-----------------------------------------------------------------------------------|
| 425.23         | 2.91570 | 1.410 | H-4→L (54%), H-2→L (38%)H-3→L (3%)                                                |
| 323.81         | 3.82890 | 0.005 | H-4→L (33%), H-2→L (47%),H-2→L+2 (12%)                                            |
| 320.03         | 3.87420 | 1.454 | H-1→L+1 (55%), H→L+1 (25%)H-6→L+1(5%),H-<br>1→L+3 (5%)                            |
| 310.86         | 3.98850 | 0.065 | H-1→L+1 (18%), H→L+1 (41%), H→L+3 (20%)H-<br>1→L+3 (4%), H-1→L+8 (3%), H→L+5 (4%) |
| 294.31         | 4.21270 | 0.751 | H-3→L+1 (36%), H-2→L+1 (15%) H-5→L+1(9%),H-                                       |

|        |         |       |                                                                           |
|--------|---------|-------|---------------------------------------------------------------------------|
|        |         |       | 3→L (3%), H-3→L+3 (5%), H-3→L+4 (2%),H-2→L+3 (7%), H-2→L+4 (4%), H→L (3%) |
| 294.14 | 4.21510 | 0.064 | H-3→L (37%), H-1→L (13%), H→L (37%)H-3→L+1(3%), H-3→L+2 (3%)              |

MO=molecular orbital, H=HOMO, L=LUMO,  $f$ = oscillator strength

**Table S23:** Wave length, excitation energy and oscillator strength of investigated compound **Q2D3**

| $\lambda$ (nm) | E(eV)   | $f$   | MO contributions                                                                          |
|----------------|---------|-------|-------------------------------------------------------------------------------------------|
| 393.74         | 3.14890 | 1.023 | H-4→L (42%), H-2→L (18%), H-1→L (34%)                                                     |
| 314.28         | 3.94500 | 0.009 | H→L (97%)                                                                                 |
| 313.60         | 3.95360 | 1.183 | H-2→L+1 (46%), H-1→L+1 (27%)H-6→L+1 (6%), H-3→L+2 (2%), H-2→L+2 (6%), H-1→L+2 (3%)        |
| 308.20         | 4.02290 | 0.134 | H→L+1 (47%), H→L+2 (33%),H-2→L+9 (2%), H→L+4 (3%), H→L+5 (6%)                             |
| 305.95         | 4.05250 | 0.168 | H-9→L (12%), H-4→L (33%), H-1→L (19%), H-1→L+3 (11%) H-8→L (3%), H-2→L (6%), H-2→L+3 (6%) |
| 300.13         | 4.13100 | 1.044 | H-3→L+1 (53%)H-5→L+1(4%),H-3→L+2(4%),H-2→L+1 (7%), H-2→L+2 (7%), H-1→L+1 (7%)             |

MO=molecular orbital, H=HOMO, L=LUMO,  $f$ = oscillator strength
